# Supplementary material for: COVID-19 Pandemic Impact on Substance Misuse: A Social Media Listening, Mixed Method Analysis
Source: MDPI journal article supplement (doi:10.3390/brainsci11070907), 2021-07-09

**Table S4.** r/Drugs related subreddits (as grouped by redditors).**Table S2a.** r/Drugs related subreddits (whole list).

| Drugs A-Z (50 subreddits) | members<br>11/12/2019 | members<br>11/05/2020 | % change |
|---------------------------|-----------------------|-----------------------|----------|
| /r/5MeODMT                | 1863                  | 2733                  | 46,70%   |
| /r/1P_LSD                 | 10535                 | 13184                 | 25,14%   |
| /r/2cb                    | 17133                 | 22212                 | 29,64%   |
| /r/4acodmt                | 1703                  | 2236                  | 31,30%   |
| /r/adderall               | 34775                 | 42896                 | 23,35%   |
| /r/afinil                 | 22947                 | 23374                 | 1,86%    |
| /r/alcohol                | 69331                 | 74183                 | 7,00%    |
| /r/ambien                 | 65191                 | 95273                 | 46,14%   |
| /r/aMT                    | 419                   | 487                   | 16,23%   |
| /r/anabolic               | 1848                  | 2028                  | 9,74%    |
| /r/Ayahuasca              | 24665                 | 29227                 | 18,50%   |
| /r/benzodiazepines        | 42140                 | 52695                 | 25,05%   |
| /r/cannabis               | 95481                 | 109485                | 14,67%   |
| /r/CannabisExtracts       | 72511                 | 83064                 | 14,55%   |
| /r/cocaine                | 52934                 | 66890                 | 26,36%   |
| /r/Cigarettes             | 29037                 | 35574                 | 22,51%   |
| /r/DrugCombos             | 1022                  | 1244                  | 21,72%   |
| /r/dissociatives          | 3838                  | 4742                  | 23,55%   |
| /r/DissonautUniverse      | 1357                  | 1650                  | 21,59%   |
| /r/DMT                    | 128395                | 157647                | 22,78%   |
| /r/DPH                    | 4918                  | 8417                  | 71,15%   |
| /r/dxm                    | 22300                 | 28370                 | 27,22%   |
| /r/fentanyl               | 1976                  | 2464                  | 24,70%   |
| /r/Kava                   | 9892                  | 11589                 | 17,16%   |
| /r/ketamine               | 25801                 | 34282                 | 32,87%   |
| /r/Kombucha               | 35487                 | 45932                 | 29,43%   |
| /r/kratom                 | 83084                 | 92846                 | 11,75%   |
| /r/lean                   | 17463                 | 23883                 | 36,76%   |
| /r/LSA                    | 5544                  | 7162                  | 29,18%   |
| /r/LSD                    | 327175                | 422806                | 29,23%   |
| /r/MDMA                   | 95371                 | 118103                | 23,84%   |
| /r/MemantineHCl           | 896                   | 1155                  | 28,91%   |
| /r/mescaline              | 6577                  | 14791                 | 124,89%  |
| /r/meth                   | 15830                 | 21953                 | 38,68%   |

|                                                |                       |                       |             |
|------------------------------------------------|-----------------------|-----------------------|-------------|
| <b>/r/modafinil</b>                            | 11971                 | 15633                 | 30,59%      |
| <b>/r/MXE</b>                                  | 585                   | 710                   | 21,37%      |
| <b>/r/noids</b>                                | 2813                  | 3428                  | 21,86%      |
| <b>/r/Nootropics</b>                           | 206148                | 222373                | 7,87%       |
| <b>/r/opiates</b>                              | 88356                 | 98812                 | 11,83%      |
| <b>/r/PCP</b>                                  | 733                   | 1060                  | 44,61%      |
| <b>/r/phenibut</b>                             | 23669                 | 25374                 | 7,20%       |
| <b>/r/PoppyTea</b>                             | 4638                  | 5219                  | 12,53%      |
| <b>/r/PsilocybinMushrooms</b>                  | 21000                 | 29948                 | 42,61%      |
| <b>/r/ResearchChemicals</b>                    | 69465                 | 83554                 | 20,28%      |
| <b>/r/Salvia</b>                               | 13766                 | 17762                 | 29,03%      |
| <b>/r/steroids</b>                             | 77093                 | 87122                 | 13,01%      |
| <b>/r/stims</b>                                | 55355                 | 66175                 | 19,55%      |
| <b>/r/TheSaviorSubstances</b>                  | 60                    | 93                    | 55,00%      |
| <b>/r/treedibles</b>                           | 84807                 | 119910                | 41,39%      |
| <b>/r/trees</b>                                | 1450686               | 1553229               | 7,07%       |
| <b>/r/gabagoodness* (see Discussion group)</b> | 2151                  | 3684                  | 71,27%      |
| <b>/r/MAOIs* (see Discussion group)</b>        | 526                   | 864                   | 64,26%      |
| <b>/r/ObscureDrugs* (see Discussion group)</b> | 3979                  | 6200                  | 55,82%      |
|                                                |                       |                       |             |
|                                                |                       |                       |             |
| Addiction/Recovery                             | members<br>11/12/2019 | members<br>11/05/2020 | %<br>change |
|                                                |                       |                       |             |
| Alcohol (10 subreddits)                        |                       |                       |             |
| <b>/r/alcoholicsanonymous</b>                  | ***                   | ***                   | ***         |
| <b>/r/alcoholism</b>                           | 27261                 | 31447                 | 15,36%      |
| <b>/r/Alcoholism_Medication</b>                | ***                   | ***                   | ***         |
| <b>/r/cripplingalcoholism</b>                  | ***                   | ***                   | ***         |
| <b>/r/cutdowndrinking</b>                      | ***                   | ***                   | ***         |
| <b>/r/dryalcoholics</b>                        | ***                   | ***                   | ***         |
| <b>/r/recoverywithoutAA</b>                    | ***                   | ***                   | ***         |
| <b>/r/stopdrinking</b>                         | ***                   | ***                   | ***         |
| <b>/r/StopDrinking</b>                         | ***                   | ***                   | ***         |
| <b>/r/stopdrinking/wiki/links</b>              | ***                   | ***                   | ***         |
|                                                |                       |                       |             |
| Nicotine (2 subreddits)                        |                       |                       |             |
| <b>/r/StopDipping</b>                          | 1086                  | 1176                  | 8,29%       |
| <b>/r/stopsmoking</b>                          | 97339                 | 105809                | 8,70%       |
|                                                |                       |                       |             |

|                                                                        |                       |                       |             |
|------------------------------------------------------------------------|-----------------------|-----------------------|-------------|
| Cocaine, crystal meth, and other stimulants (1 subreddit)              |                       |                       |             |
| <b>/r/stopspeeding</b>                                                 | 7597                  | 10056                 | 32,37%      |
| Miscellaneous (1 subreddit)                                            |                       |                       |             |
| <b>/r/decaf</b>                                                        | 9675                  | 12624                 | 30,48%      |
| Vicodin, Percocet, heroin, and other opioid painkillers (5 subreddits) |                       |                       |             |
| <b>/r/HeroinHeroines</b>                                               | 1871                  | 2415                  | 29,08%      |
| <b>/r/Methadone</b>                                                    | 4930                  | 7029                  | 42,58%      |
| <b>/r/OpiatesRecovery</b>                                              | 22272                 | 24925                 | 11,91%      |
| <b>/r/quittingkratom</b>                                               | 10830                 | 13456                 | 24,25%      |
| <b>/r/suboxone</b>                                                     | 5330                  | 7182                  | 34,75%      |
| Miscellaneous sedatives (2 subreddits)                                 |                       |                       |             |
| <b>/r/quittingphenibut</b>                                             | 2355                  | 3338                  | 41,74%      |
| <b>/r/benzorecovery</b>                                                | 8907                  | 12169                 | 36,62%      |
| Cannabis (2 subreddits)                                                |                       |                       |             |
| <b>/r/leaves</b>                                                       | 111635                | 133309                | 19,42%      |
| <b>/r/Petioles</b>                                                     | 36471                 | 53158                 | 45,75%      |
| Recovery (12 subreddits)                                               |                       |                       |             |
| <b>/r/addiction</b>                                                    | 36484                 | 41615                 | 14,06%      |
| /r/addictionprevention                                                 | ***                   | ***                   | ***         |
| /r/AtheistTwelveSteppers                                               | ***                   | ***                   | ***         |
| /r/easyway                                                             | ***                   | ***                   | ***         |
| /r/recovery                                                            | ***                   | ***                   | ***         |
| /r/redditorsinrecovery                                                 | ***                   | ***                   | ***         |
| /r/ResearchRecovery                                                    | ***                   | ***                   | ***         |
| /r/secularsobriety                                                     | ***                   | ***                   | ***         |
| /r/SMARTRecovery                                                       | ***                   | ***                   | ***         |
| /r/sober                                                               | ***                   | ***                   | ***         |
| /r/sobrietyandrecovery                                                 | ***                   | ***                   | ***         |
| /r/women_in_recovery                                                   | ***                   | ***                   | ***         |
| Therapeutic use (6 subreddits)                                         | members<br>11/12/2019 | members<br>11/05/2020 | %<br>change |
| <b>/r/AnAnswerToHeal</b>                                               | 3081                  | 3161                  | 2,60%       |
| <b>/r/mdmaththerapy</b>                                                | 6856                  | 8276                  | 20,71%      |

|                                |                       |                       |             |
|--------------------------------|-----------------------|-----------------------|-------------|
| /r/microdosing                 | 92534                 | 108277                | 17,01%      |
| /r/PsychedelicTherapy          | 5068                  | 6193                  | 22,20%      |
| /r/StackAdvice                 | 31297                 | 33569                 | 7,26%       |
| /r/Supplements                 | 107951                | 126614                | 17,29%      |
|                                |                       |                       |             |
|                                |                       |                       |             |
| Harm Reduction (10 subreddits) | members<br>11/12/2019 | members<br>11/05/2020 | %<br>change |
| /r/Ecinternational             | ***                   | ***                   | ***         |
| /r/erowid                      | ***                   | ***                   | ***         |
| /r/HPPD                        | 2738                  | 3967                  | 44,89%      |
| /r/PillReports                 | ***                   | ***                   | ***         |
| /r/ReagentTesting              | ***                   | ***                   | ***         |
| /r/saplings                    | ***                   | ***                   | ***         |
| /r/SSDP                        | ***                   | ***                   | ***         |
| /r/tinnitus                    | ***                   | ***                   | ***         |
| /r/TripSit                     | ***                   | ***                   | ***         |
| /r/HarmReduction               | ***                   | ***                   | ***         |
|                                |                       |                       |             |
|                                |                       |                       |             |
|                                |                       |                       |             |
| Cultivation (11 subreddits)    | members<br>11/12/2019 | members<br>11/05/2020 | %<br>change |
| /r/Autoflowers                 | 31450                 | 52773                 | 67,80%      |
| /r/DMTGuide                    | 10674                 | 15400                 | 44,28%      |
| /r/druggardening               | 35646                 | 42855                 | 20,22%      |
| /r/hempflowers                 | 16604                 | 23577                 | 42,00%      |
| /r/macrogrowery                | 26132                 | 35498                 | 35,84%      |
| /r/MephHeads                   | 6382                  | 13517                 | 111,80%     |
| /r/Microgrowery                | 178048                | 207194                | 16,37%      |
| /r/MushroomGrowers             | 40477                 | 69832                 | 72,52%      |
| /r/shroomers                   | 41100                 | 48348                 | 17,64%      |
| /r/shrooms                     | 170727                | 221673                | 29,84%      |
| /r/Mycology                    | 170056                | 211101                | 24,14%      |
|                                |                       |                       |             |
|                                |                       |                       |             |
| Discussion (47 subreddits)     | members<br>11/12/2019 | members<br>11/05/2020 | %<br>change |
| /r/AmsterdamEnts NL            | ***                   | ***                   | ***         |
| /r/AskDrugNerds                | ***                   | ***                   | ***         |
| /r/AskDrugs                    | ***                   | ***                   | ***         |

|                          |        |        |        |
|--------------------------|--------|--------|--------|
| /r/BartardStories        | ***    | ***    | ***    |
| /r/bestoferowid          | ***    | ***    | ***    |
| /r/Borax                 | ***    | ***    | ***    |
| /r/currentlytripping     | ***    | ***    | ***    |
| /r/druganalytics         | ***    | ***    | ***    |
| /r/druggitors            | ***    | ***    | ***    |
| /r/DrugMods              | ***    | ***    | ***    |
| /r/DrugNerds             | 88195  | 98619  | 11,82% |
| /r/drugpolicy            | ***    | ***    | ***    |
| /r/drugsbooks            | ***    | ***    | ***    |
| /r/DrugShowerThoughts    | ***    | ***    | ***    |
| /r/drugsover30           | ***    | ***    | ***    |
| /r/eldertrees            | ***    | ***    | ***    |
| /r/FADQ                  | ***    | ***    | ***    |
| /r/gabagoodness*         | 2151   | 3684   | 71,27% |
| /r/highdeas              | ***    | ***    | ***    |
| /r/MAOIs*                | 526    | 864    | 64,26% |
| /r/nothowdrugswork       | ***    | ***    | ***    |
| /r/ObscureDrugs*         | 3979   | 6200   | 55,82% |
| /r/olling                | ***    | ***    | ***    |
| /r/OpiateChurch          | ***    | ***    | ***    |
| /r/opiateswriters        | ***    | ***    | ***    |
| /r/pharmacology          | ***    | ***    | ***    |
| /r/plugging              | ***    | ***    | ***    |
| /r/PsychedelicMentions   | ***    | ***    | ***    |
| /r/PsychedelicMessages   | ***    | ***    | ***    |
| /r/Psychedelics          | 65956  | 97612  | 48,00% |
| /r/PsychedelicStudies    | ***    | ***    | ***    |
| /r/PsychoactivePoetry    | ***    | ***    | ***    |
| /r/Psychonaut            | 249642 | 282864 | 13,31% |
| /r/PsychonautReadingClub | ***    | ***    | ***    |
| /r/psychonautreads       | ***    | ***    | ***    |
| /r/psychopharmacology    | ***    | ***    | ***    |
| /r/RationalPsychonaut    | ***    | ***    | ***    |
| /r/RiftintotheMind       | ***    | ***    | ***    |
| /r/StonerPhilosophy      | ***    | ***    | ***    |
| /r/TeenageDrugs          | ***    | ***    | ***    |
| /r/TheeHive              | ***    | ***    | ***    |
| /r/timetolegalize        | ***    | ***    | ***    |

|                               |        |        |       |
|-------------------------------|--------|--------|-------|
| /r/TripReports                | ***    | ***    | ***   |
| /r/TripTales                  | ***    | ***    | ***   |
| /r/Triptongue                 | ***    | ***    | ***   |
| /r/tryptonaut                 | ***    | ***    | ***   |
| /r/vaporents                  | 129706 | 141758 | 9,29% |
|                               |        |        |       |
|                               |        |        |       |
| Misc (6 subreddits)           |        |        |       |
| /r/DrugTestHelp               | ***    | ***    | ***   |
| /r/DrugTests                  | ***    | ***    | ***   |
| /r/EntExchange                | ***    | ***    | ***   |
| /r/glassheads                 | ***    | ***    | ***   |
| /r/mflb                       | ***    | ***    | ***   |
| /r/TripCaves                  | ***    | ***    | ***   |
|                               |        |        |       |
|                               |        |        |       |
| Pics & Videos (13 subreddits) |        |        |       |
| /r/currentlytripping          | ***    | ***    | ***   |
| /r/DrugArt                    | ***    | ***    | ***   |
| /r/drugsarebeautiful          | ***    | ***    | ***   |
| /r/DrugStaches                | ***    | ***    | ***   |
| /r/DrugVideos                 | ***    | ***    | ***   |
| /r/Heavymind                  | ***    | ***    | ***   |
| /r/LSDselfies                 | ***    | ***    | ***   |
| /r/nugs                       | ***    | ***    | ***   |
| /r/pillhead                   | ***    | ***    | ***   |
| /r/psychedelicartwork         | ***    | ***    | ***   |
| /r/replications               | ***    | ***    | ***   |
| /r/trippy                     | ***    | ***    | ***   |
| /r/woahdude                   | ***    | ***    | ***   |
|                               |        |        |       |
|                               |        |        |       |
| YouTube (3 subreddits)        |        |        |       |
| /r/DrugsLab                   | ***    | ***    | ***   |
| /r/thedrugclassroom           | ***    | ***    | ***   |
| /r/PsychedSubstance           | ***    | ***    | ***   |
|                               |        |        |       |
|                               |        |        |       |
| Memes (6 subreddits)          |        |        |       |
| /r/cripplingalcoholism        | ***    | ***    | ***   |

|                                   |     |     |     |
|-----------------------------------|-----|-----|-----|
| /r/drugcirclejerk                 | *** | *** | *** |
| /r/drugmemes                      | *** | *** | *** |
| /r/drugscirclejerk                | *** | *** | *** |
| /r/drunk                          | *** | *** | *** |
| /r/LSDcirclejerk                  | *** | *** | *** |
|                                   |     |     |     |
|                                   |     |     |     |
| Music (9 subreddits)              |     |     |     |
| /r/DrugsMusic                     | *** | *** | *** |
| /r/DXMMusic                       | *** | *** | *** |
| /r/gethightothis                  | *** | *** | *** |
| /r/lucymusic                      | *** | *** | *** |
| /r/mdmazingMusic                  | *** | *** | *** |
| /r/TripMusic                      | *** | *** | *** |
| /r/WNOD                           | *** | *** | *** |
| /r/WoahTunes                      | *** | *** | *** |
| /r/TrippingPlaylists              | *** | *** | *** |
|                                   |     |     |     |
|                                   |     |     |     |
| Festivals (3 subreddits)          |     |     |     |
| /r/concertdrugs                   | *** | *** | *** |
| /r/aves                           | *** | *** | *** |
| /r/festivals                      | *** | *** | *** |
|                                   |     |     |     |
|                                   |     |     |     |
| Regions/Languages (18 subreddits) |     |     |     |
| /r/AsiaTripper                    | *** | *** | *** |
| /r/ausents AU                     | *** | *** | *** |
| /r/Canadients CA                  | *** | *** | *** |
| /r/crainn IE                      | *** | *** | *** |
| /r/DanishEnts DK                  | *** | *** | *** |
| /r/DrogasBrasil BR banned         | *** | *** | *** |
| /r/drogen DE                      | *** | *** | *** |
| /r/GermanTrees DE                 | *** | *** | *** |
| /r/IndianEnts IN                  | *** | *** | *** |
| /r/norwegianents NO               | *** | *** | *** |
| /r/NZTrees NZ                     | *** | *** | *** |
| /r/PsychonautDE DE                | *** | *** | *** |
| /r/ResearchChemicalsNL NL         | *** | *** | *** |
| /r/rusmidler NO                   | *** | *** | *** |

|                                                                                       |                       |                       |             |
|---------------------------------------------------------------------------------------|-----------------------|-----------------------|-------------|
| /r/samelevel                                                                          | ***                   | ***                   | ***         |
| /r/swedents se                                                                        | ***                   | ***                   | ***         |
| /r/ukdrugs banned                                                                     | ***                   | ***                   | ***         |
| /r/uktrees GB                                                                         | ***                   | ***                   | ***         |
|                                                                                       |                       |                       |             |
|                                                                                       |                       |                       |             |
| r/Drugs (main subreddit)                                                              | members<br>11/12/2019 | members<br>11/05/2019 | %<br>change |
| <b>r/Drugs</b>                                                                        | 619563                | 676581                | 9,20%       |
|                                                                                       |                       |                       |             |
|                                                                                       |                       |                       |             |
| <b>Other subreddits</b>                                                               | members<br>11/12/2019 | members<br>11/05/2019 | %<br>change |
| /r/covid19stack**                                                                     | 0                     | 562                   |             |
| r/Opioid_RCs**                                                                        | 825                   | 1952                  | 136,61%     |
|                                                                                       |                       |                       |             |
|                                                                                       |                       |                       |             |
| <b>Table S2b. r/Drugs related subreddits (excluding the not analysed subreddits).</b> |                       |                       |             |
|                                                                                       | members<br>11/12/2019 | members<br>11/05/2019 | %<br>change |
| /r/1P_LSD                                                                             | 10535                 | 13184                 | 25,14%      |
| /r/2cb                                                                                | 17133                 | 22212                 | 29,64%      |
| /r/4acodmt                                                                            | 1703                  | 2236                  | 31,30%      |
| /r/5MeODMT                                                                            | 1863                  | 2733                  | 46,70%      |
| /r/adderall                                                                           | 34775                 | 42896                 | 23,35%      |
| /r/addiction                                                                          | 36484                 | 41615                 | 14,06%      |
| /r/afinil                                                                             | 22947                 | 23374                 | 1,86%       |
| /r/alcohol                                                                            | 69331                 | 74183                 | 7,00%       |
| /r/alcoholism                                                                         | 27261                 | 31447                 | 15,36%      |
| /r/ambien                                                                             | 65191                 | 95273                 | 46,14%      |
| /r/aMT                                                                                | 419                   | 487                   | 16,23%      |
| /r/anabolic                                                                           | 1848                  | 2028                  | 9,74%       |
| /r/AnAnswerToHeal                                                                     | 3081                  | 3161                  | 2,60%       |
| /r/Autoflowers                                                                        | 31450                 | 52773                 | 67,80%      |
| /r/Ayahuasca                                                                          | 24665                 | 29227                 | 18,50%      |
| /r/benzodiazepines                                                                    | 42140                 | 52695                 | 25,05%      |
| /r/benzorecovery                                                                      | 8907                  | 12169                 | 36,62%      |
| /r/cannabis                                                                           | 95481                 | 109485                | 14,67%      |
| /r/CannabisExtracts                                                                   | 72511                 | 83064                 | 14,55%      |
| /r/Cigarettes                                                                         | 29037                 | 35574                 | 22,51%      |
| /r/cocaine                                                                            | 52934                 | 66890                 | 26,36%      |
| /r/covid19stack**                                                                     | 0                     | 562                   | -           |



|                      |        |        |         |
|----------------------|--------|--------|---------|
| /r/decaf             | 9675   | 12624  | 30,48%  |
| /r/dissociatives     | 3838   | 4742   | 23,55%  |
| /r/DissonautUniverse | 1357   | 1650   | 21,59%  |
| /r/DMT               | 128395 | 157647 | 22,78%  |
| /r/DMTGuide          | 10674  | 15400  | 44,28%  |
| /r/DPH               | 4918   | 8417   | 71,15%  |
| /r/DrugCombos        | 1022   | 1244   | 21,72%  |
| /r/druggardening     | 35646  | 42855  | 20,22%  |
| /r/DrugNerds         | 88195  | 98619  | 11,82%  |
| /r/Drugs             | 619563 | 676581 | 9,20%   |
| /r/dxm               | 22300  | 28370  | 27,22%  |
| /r/fentanyl          | 1976   | 2464   | 24,70%  |
| /r/gabagoodness*     | 2151   | 3684   | 71,27%  |
| /r/hempflowers       | 16604  | 23577  | 42,00%  |
| /r/HeroinHeroines    | 1871   | 2415   | 29,08%  |
| /r/HPPD              | 2738   | 3967   | 44,89%  |
| /r/Kava              | 9892   | 11589  | 17,16%  |
| /r/ketamine          | 25801  | 34282  | 32,87%  |
| /r/Kombucha          | 35487  | 45932  | 29,43%  |
| /r/kratom            | 83084  | 92846  | 11,75%  |
| /r/lean              | 17463  | 23883  | 36,76%  |
| /r/leaves            | 111635 | 133309 | 19,42%  |
| /r/LSA               | 5544   | 7162   | 29,18%  |
| /r/LSD               | 327175 | 422806 | 29,23%  |
| /r/macrogrowery      | 26132  | 35498  | 35,84%  |
| /r/MAOIs*            | 526    | 864    | 64,26%  |
| /r/MDMA              | 95371  | 118103 | 23,84%  |
| /r/mdmatherapy       | 6856   | 8276   | 20,71%  |
| /r/MemantineHCl      | 896    | 1155   | 28,91%  |
| /r/MephHeads         | 6382   | 13517  | 111,80% |
| /r/mescaline         | 6577   | 14791  | 124,89% |
| /r/meth              | 15830  | 21953  | 38,68%  |
| /r/Methadone         | 4930   | 7029   | 42,58%  |
| /r/microdosing       | 92534  | 108277 | 17,01%  |
| /r/Microgrowery      | 178048 | 207194 | 16,37%  |
| /r/modafinil         | 11971  | 15633  | 30,59%  |
| /r/MushroomGrowers   | 40477  | 69832  | 72,52%  |
| /r/MXE               | 585    | 710    | 21,37%  |
| /r/Mycology          | 170056 | 211101 | 24,14%  |

|                        |         |         |         |
|------------------------|---------|---------|---------|
| /r/noids               | 2813    | 3428    | 21,86%  |
| /r/Nootropics          | 206148  | 222373  | 7,87%   |
| /r/ObscureDrugs*       | 3979    | 6200    | 55,82%  |
| /r/opiates             | 88356   | 98812   | 11,83%  |
| /r/OpiatesRecovery     | 22272   | 24925   | 11,91%  |
| /r/Opioid_RCs**        | 825     | 1952    | 136,61% |
| /r/PCP                 | 733     | 1060    | 44,61%  |
| /r/Petioles            | 36471   | 53158   | 45,75%  |
| /r/phenibut            | 23669   | 25374   | 7,20%   |
| /r/PoppyTea            | 4638    | 5219    | 12,53%  |
| /r/PsilocybinMushrooms | 21000   | 29948   | 42,61%  |
| /r/Psychedelics        | 65956   | 97612   | 48,00%  |
| /r/PsychedelicTherapy  | 5068    | 6193    | 22,20%  |
| /r/Psychonaut          | 249642  | 282864  | 13,31%  |
| /r/quittingkratom      | 10830   | 13456   | 24,25%  |
| /r/quittingphenibut    | 2355    | 3338    | 41,74%  |
| /r/ResearchChemicals   | 69465   | 83554   | 20,28%  |
| /r/Salvia              | 13766   | 17762   | 29,03%  |
| /r/shroomers           | 41100   | 48348   | 17,64%  |
| /r/shrooms             | 170727  | 221673  | 29,84%  |
| /r/StackAdvice         | 31297   | 33569   | 7,26%   |
| /r/steroids            | 77093   | 87122   | 13,01%  |
| /r/stims               | 55355   | 66175   | 19,55%  |
| /r/StopDipping         | 1086    | 1176    | 8,29%   |
| /r/stopsmoking         | 97339   | 105809  | 8,70%   |
| /r/stopspeeding        | 7597    | 10056   | 32,37%  |
| /r/suboxone            | 5330    | 7182    | 34,75%  |
| /r/Supplements         | 107951  | 126614  | 17,29%  |
| /r/TheSaviorSubstances | 60      | 93      | 55,00%  |
| /r/treedibles          | 84807   | 119910  | 41,39%  |
| /r/trees               | 1450686 | 1553229 | 7,07%   |
| /r/vaporents           | 129706  | 141758  | 9,29%   |

#### Legend

#### Colours

psychedelics

cognitive enhancers/PIEDS/supplements

entactogens

|                                                                 |  |  |  |
|-----------------------------------------------------------------|--|--|--|
| cannabimimetics                                                 |  |  |  |
| dissociatives                                                   |  |  |  |
| stimulants                                                      |  |  |  |
| opioids                                                         |  |  |  |
| gabaergics, gabapentinoids and various psychotropic medications |  |  |  |
| research chemicals                                              |  |  |  |
| other subreddits included among Drugs A-Z by redditors          |  |  |  |
| beverages, brews and infusions                                  |  |  |  |
| other psychoactive substances (cigarettes, alcohol)             |  |  |  |

|                                                                                                                                                                                                         |
|---------------------------------------------------------------------------------------------------------------------------------------------------------------------------------------------------------|
| <b>Asterisks/slashes</b>                                                                                                                                                                                |
| * included in this group by the Authors; listed in other groups by the redditors                                                                                                                        |
| ** included in this group by the Authors; not among the r/Drugs related subreddits                                                                                                                      |
| *** not included in the analysis                                                                                                                                                                        |
| / impossible to obtain/no data                                                                                                                                                                          |
|                                                                                                                                                                                                         |
| <b>Bold</b> = selected subreddits for qualitative and/or quantitative analysis                                                                                                                          |
|                                                                                                                                                                                                         |
| <b>Italics (numbers)</b> = approximate data (approximated to the nearest available data as close as possible to day 11 of each month/corrected value; approximated excluding irrelevant posts/comments) |

**Table S2 summary.** Member trends from December 2019 to May 2020.

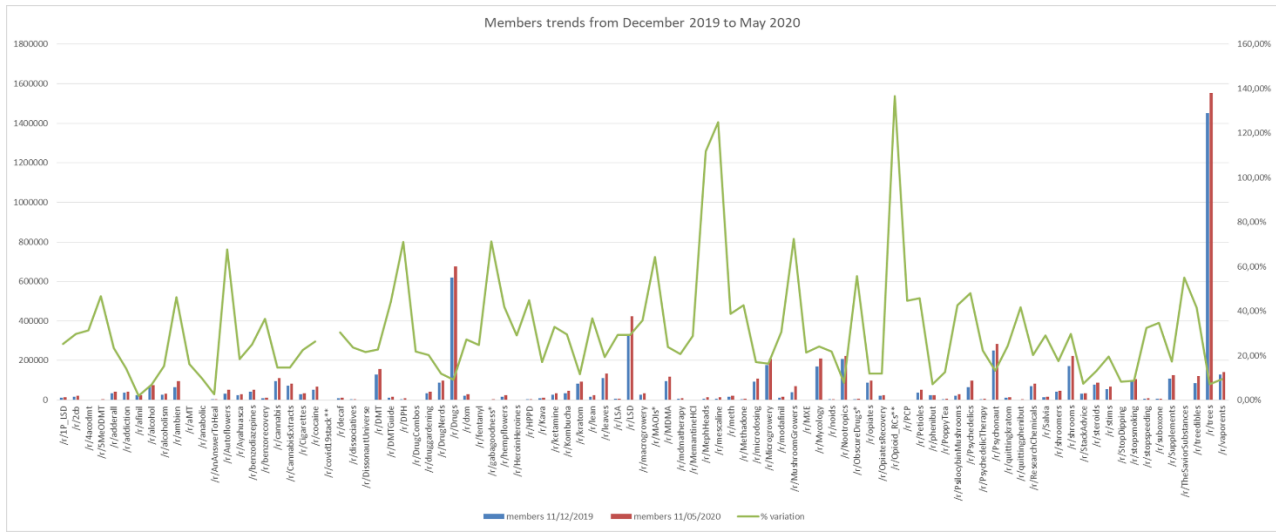

Supplement: s1 [file s1]
