# Supplementary material for: COVID-19 Pandemic Impact on Substance Misuse: A Social Media Listening, Mixed Method Analysis
Source: Brain Sci. 2021 Jul 9;11(7):907. doi: 10.3390/brainsci11070907 (PMC8303488; doi:10.3390/brainsci11070907)
Supplement: Supplementary file 1 [file brainsci-11-00907-s001.zip]

Archive with 4 entries (4 files):
- Table S1 Covid-19 impact on substance misuse psychonauts.xlsx
- Table S2 Main themes Covid-19 impact on substance misuse psychonauts.pdf
- Table S3 Covid-19 impact on substance misuse psychonauts.xlsx
- Table S4 Covid-19 impact on substance misuse psychonauts.pdf
