# Supplementary material for: COVID-19 Pandemic Impact on Substance Misuse: A Social Media Listening, Mixed Method Analysis
Source: Brain Sci. 2021 Jul 9;11(7):907. doi: 10.3390/brainsci11070907 (PMC8303488; doi:10.3390/brainsci11070907)
Supplement: Supplementary file 1 [file brainsci-11-00907-s001.zip › Table S1 Covid-19 impact on substance misuse psychonauts.xlsx]

## Sheet: Table S1
Table S1. Selected subreddits' quantitative analysis: members, posts/comments by keywords, grouped by pharmacological classes (vertical) and according to redditor's classification (horizontal).
Drugs A-Z subreddit group by classes													Addiction/Recovery by pharmacological classes							Cultivation by pharmacological classes								Therapeutic use group by pharmacological classes					Harm Reduction by pharmacological classes			Discussion by pharmacological classes
Psychedelics (lysergamides, tryptamines, 2C series, etc.)																				psychedelics (lysergamides, tryptamines, 2C series, etc.)								psychedelics (lysergamides, tryptamines, 2C series, etc.)
	r/1P_LSD	r/2cb	r/4acodmt	r/5MeODMT	r/aMT	r/DMT	r/LSA	r/LSD	r/mescaline	r/PsilocybinMushrooms	r/Salvia										r/DMTGuide	r/MushroomGrowers	r/shroomers	r/shrooms	r/Mycology				r/AnAnswerToHeal	r/microdosing	r/PsychedelicTherapy						r/Psychedelics
members																				members								members								members
2019-12-11	10535	17133	1703	1863	419	128395	5544	327175	6577	21000	13766									2019-12-11	10674	40477	41100	170727	170056			2019-12-11	3081	92534	5068					2019-12-11	65956
2020-01-11	11033	18863	1831	2013	431	137267	5747	350493	7911	22463	14411									2020-01-11	11294	43443	42240	180074	177536			2020-01-11	3084	95362	5308					2020-01-11	69222
2020-02-11	11549	19711	1931	2205	441	142725	6025	393717	9056	24240	15261									2020-02-11	12061	47730	43620	190078	184471			2020-02-11	3102	98900	5609					2020-02-11	77758
11/03/2020	12015	20578	2015	2402	450	147013	6281	394960	10292	25745	15971									11/03/2020	12963	52677	44912	198672	190996			11/03/2020	3116	102203	5816					11/03/2020	85158
2020-04-11	12569	21338	2082	2539	466	152310	6672	409032	12197	25522	16852									2020-04-11	14732	60566	46384	209903	200347			2020-04-11	3142	104816	5985					2020-04-11	90859
2020-05-11	13184	22212	2236	2733	487	157647	7162	422806	14791	29948	17762									2020-05-11	15400	69832	48348	221673	211101			2020-05-11	3161	108277	6193					2020-05-11	97612
first post	2020-03-14	2020-03-07	2020-03-12	/	/	2020-01-29	2020-03-28	2020-01-04	2020-03-23	2020-03-02	25/02/2020									first post	2020-03-18	2020-03-14	2020-03-03	2020-01-29	2020-01-27			first post	2020-03-17	2020-03-02	2020-03-12					first post	29/02/2020
first comment	2020-03-15	2020-01-26	2020-04-08	/	/	2020-02-04	2020-03-11	2020-01-23	2020-03-23	2020-02-08	2020-02-25									first comment	2020-02-17	2020-01-24	2020-02-25	2020-01-24	2020-01-27			first comment	2020-05-15	2020-03-07	2020-03-25					first comment	14/02/2020
keywords																				keywords								keywords								keywords
covid												total								covid							total	covid				total				covid			total
posts																				posts								posts								posts
2019-12-11	0	0	0	0	0	0	0	0	0	0	0	0								2019-12-11	0	0	0	0	0		0	2019-12-11	0	0	0	0				2019-12-11	0		0
2020-01-11	0	0	0	0	0	0	0	0	0	0	0	0								2020-01-11	0	0	0	0	0		0	2020-01-11	0	0	0	0				2020-01-11	0		0
2020-02-11	0	0	0	0	0	0	0	0	0	0	0	0								2020-02-11	0	0	0	0	0		0	2020-02-11	0	0	0	0				2020-02-11	0		0
11/03/2020	0	1	0	0	0	0	0	1	0	1	0	3								11/03/2020	0	0	1	3	0		4	11/03/2020	0	1	0	1				11/03/2020	0		0
2020-04-11	3	1	1	0	0	17	1	59	4	7	3	96								2020-04-11	3	20	5	55	4		87	2020-04-11	0	12	1	13				2020-04-11	11		11
2020-05-11	4	2	2	0	0	24	1	96	4	10	4	147								2020-05-11	4	31	9	90	13		147	2020-05-11	0	18	2	20				2020-05-11	24		24
comments																				comments								comments								comments
2019-12-11	0	0	0	0	0	0	0	0	0	0	0	0								2019-12-11	0	0	0	0	0		0	2019-12-11	0	0	0	0				2019-12-11	0		0
2020-01-11	0	0	0	0	0	0	0	0	0	0	0	0								2020-01-11	0	0	0	0	0		0	2020-01-11	0	0	0	0				2020-01-11	0		0
2020-02-11	0	0	0	0	0	0	0	0	0	0	0	0								2020-02-11	0	0	0	0	0		0	2020-02-11	0	0	0	0				2020-02-11	0		0
11/03/2020	0	0	0	0	0	0	0	1	0	0	0	1								11/03/2020	0	0	0	4	0		4	11/03/2020	0	1	0	1				11/03/2020	0		0
2020-04-11	10	5	0	0	0	23	2	69	3	6	0	118								2020-04-11	2	17	5	83	9		116	2020-04-11	0	32	4	36				2020-04-11	14		14
2020-05-11	13	9	0	0	0	54	5	130	3	11	5	230								2020-05-11	6	30	12	148	21		217	2020-05-11	0	50	4	54				2020-05-11	27		27
coronavirus												total								coronavirus							total	coronavirus				total				coronavirus			total
posts																				posts								posts								posts
2019-12-11	0	0	0	0	0	0	0	0	0	0	0	0								2019-12-11	0	0	0	0	0		0	2019-12-11	0	0	0	0				2019-12-11	0		0
2020-01-11	0	0	0	0	0	0	0	0	0	0	0	0								2020-01-11	0	0	0	0	0		0	2020-01-11	0	0	0	0				2020-01-11	0		0
2020-02-11	0	0	0	0	0	0	0	0	0	0	0	0								2020-02-11	0	0	0	2	1		3	2020-02-11	0	0	0	0				2020-02-11	0		0
11/03/2020	0	1	0	0	0	3	0	3	0	0	0	7								11/03/2020	0	3	1	12	4		20	11/03/2020	0	2	0	2				11/03/2020	1		1
2020-04-11	4	4	1	0	0	31	0	60	2	4	1	107								2020-04-11	0	13	5	54	7		79	2020-04-11	0	11	2	13				2020-04-11	18		18
2020-05-11	4	4	1	0	0	37	2	80	2	6	1	137								2020-05-11	0	14	5	60	7		86	2020-05-11	0	15	4	19				2020-05-11	26		26
comments																				comments								comments								comments
2019-12-11	0	0	0	0	0	0	0	0	0	0	0	0								2019-12-11	0	0	0	0	0		0	2019-12-11	0	0	0	0				2019-12-11	0		0
2020-01-11	0	0	0	0	0	0	0	0	0	0	0	0								2020-01-11	0	0	0	0	0		0	2020-01-11	0	0	0	0				2020-01-11	0		0
2020-02-11	0	0	0	0	0	0	0	2	0	0	0	2								2020-02-11	0	1	0	8	2		11	2020-02-11	0	0	0	0				2020-02-11	0		0
11/03/2020	0	2	0	0	0	7	1	11	0	0	0	21								11/03/2020	3	3	1	23	14		44	11/03/2020	0	1	0	1				11/03/2020	1		1
2020-04-11	3	4	0	0	0	34	4	72	0	5	1	123								2020-04-11	3	18	5	77	23		126	2020-04-11	0	16	0	16				2020-04-11	21		21
2020-05-11	4	6	1	0	0	46	6	96	0	7	1	167								2020-05-11	4	22	7	92	27		152	2020-05-11	3	22	2	27				2020-05-11	28		28
corona												total								corona							total	corona				total				corona			total
posts																				posts								posts								posts
2019-12-11	0	0	0	0	0	0	0	0	0	0	0	0								2019-12-11	0	0	0	0	0		0	2019-12-11	0	0	0	0				2019-12-11	0		0
2020-01-11	0	0	0	0	0	0	0	0	0	0	0	0								2020-01-11	0	0	0	0	0		0	2020-01-11	0	0	0	0				2020-01-11	0		0
2020-02-11	0	0	0	0	0	0	0	1	0	1	0	2								2020-02-11	0	0	0	0	0		0	2020-02-11	0	0	0	0				2020-02-11	0		0
11/03/2020	0	0	0	0	0	1	0	2	0	1	1	5								11/03/2020	0	1	0	4	1		6	11/03/2020	0	1	0	1				11/03/2020	0		0
2020-04-11	3	3	0	0	0	12	1	86	0	3	2	110								2020-04-11	1	4	3	46	5		59	2020-04-11	0	6	0	6				2020-04-11	12		12
2020-05-11	5	7	0	0	0	15	2	129	0	4	3	165								2020-05-11	2	6	6	59	7		80	2020-05-11	0	10	0	10				2020-05-11	17		17
comments																				comments								comments								comments
2019-12-11	0	0	0	0	0	0	0	0	0	0	0	0								2019-12-11	0	0	0	0	0		0	2019-12-11	0	0	0	0				2019-12-11	0		0
2020-01-11	0	1	0	0	0	0	0	0	0	0	0	1								2020-01-11	0	0	0	0	0		0	2020-01-11	0	0	0	0				2020-01-11	0		0
2020-02-11	0	7	0	0	0	1	0	5	0	0	0	13								2020-02-11	0	1	0	4	1		6	2020-02-11	0	0	0	0				2020-02-11	0		0
11/03/2020	0	19	0	0	0	5	0	8	0	0	1	33								11/03/2020	3	5	1	15	6		30	11/03/2020	0	2	0	2				11/03/2020	2		2
2020-04-11	7	19	0	0	0	42	5	139	0	5	5	222								2020-04-11	4	14	7	89	18		132	2020-04-11	0	13	0	13				2020-04-11	22		22
2020-05-11	11	23	0	0	0	60	6	236	0	13	8	357								2020-05-11	5	21	10	118	24		178	2020-05-11	0	20	0	20				2020-05-11	30		30
quarantine												total								quarantine							total	quarantine				total				quarantine			total
posts																				posts								posts								posts
2019-12-11	0	0	0	0	0	0	0	0	0	0	0	0								2019-12-11	0	0	0	0	0		0	2019-12-11	0	0	0	0				2019-12-11	0		0
2020-01-11	0	0	0	0	0	0	0	0	0	0	0	0								2020-01-11	0	0	0	0	0		0	2020-01-11	0	0	0	0				2020-01-11	0		0
2020-02-11	0	0	0	0	0	0	0	0	0	0	0	0								2020-02-11	0	0	0	0	0		0	2020-02-11	0	0	0	0				2020-02-11	0		0
11/03/2020	0	0	0	0	0	0	0	0	0	0	0	0								11/03/2020	0	1	0	0	0		1	11/03/2020	0	1	0	1				11/03/2020	0		0
2020-04-11	5	9	0	0	0	41	1	270	1	10	4	341								2020-04-11	2	31	15	203	15		266	2020-04-11	0	13	0	13				2020-04-11	49		49
2020-05-11	12	10	0	0	0	62	3	488	3	23	8	609								2020-05-11	3	54	22	337	20		436	2020-05-11	0	28	1	29				2020-05-11	88		88
comments																				comments								comments								comments
2019-12-11	0	0	0	0	0	0	0	0	0	0	0	0								2019-12-11	0	0	0	0	0		0	2019-12-11	0	0	0	0				2019-12-11	0		0
2020-01-11	0	0	0	0	0	0	0	0	0	0	0	0								2020-01-11	0	0	0	0	0		0	2020-01-11	0	0	0	0				2020-01-11	0		0
2020-02-11	0	0	0	0	0	0	0	1	0	0	0	1								2020-02-11	0	0	0	0	2		2	2020-02-11	0	0	0	0				2020-02-11	0		0
11/03/2020	0	1	0	0	0	2	0	3	0	3	0	9								11/03/2020	0	4	0	0	3		7	11/03/2020	0	1	0	1				11/03/2020	0		0
2020-04-11	8	10	1	0	0	26	2	218	1	15	5	286								2020-04-11	6	31	8	141	14		200	2020-04-11	0	31	1	32				2020-04-11	35		35
2020-05-11	14	21	1	0	0	54	7	415	4	22	10	548								2020-05-11	7	56	15	234	31		343	2020-05-11	0	63	4	67				2020-05-11	63		63
pandemic												total								pandemic							total	pandemic				total				pandemic			total
posts																				posts								posts								posts
2019-12-11	0	0	0	0	0	0	0	0	0	0	0	0								2019-12-11	0	0	0	0	0		0	2019-12-11	0	0	0	0				2019-12-11	0		0
2020-01-11	0	0	0	0	0	0	0	0	0	0	0	0								2020-01-11	0	0	0	0	0		0	2020-01-11	0	0	0	0				2020-01-11	0		0
2020-02-11	0	0	0	0	0	0	0	0	0	0	0	0								2020-02-11	0	0	0	0	0		0	2020-02-11	0	0	0	0				2020-02-11	0		0
11/03/2020	0	0	0	0	0	0	0	0	0	0	0	0								11/03/2020	0	0	0	0	0		0	11/03/2020	0	0	0	0				11/03/2020	0		0
2020-04-11	5	3	0	0	0	8	0	30	1	4	0	51								2020-04-11	2	13	1	21	1		38	2020-04-11	0	5	0	5				2020-04-11	10		10
2020-05-11	5	3	0	0	0	14	1	52	1	7	2	85								2020-05-11	4	15	3	50	6		78	2020-05-11	0	14	1	15				2020-05-11	15		15
comments																				comments								comments								comments
2019-12-11	0	0	0	0	0	0	0	0	0	0	0	0								2019-12-11	0	0	0	0	0		0	2019-12-11	0	0	0	0				2019-12-11	0		0
2020-01-11	0	0	0	0	0	0	0	0	0	0	0	0								2020-01-11	0	0	0	0	0		0	2020-01-11	0	0	0	0				2020-01-11	0		0
2020-02-11	0	0	0	0	0	1	0	1	0	0	0	2								2020-02-11	0	0	0	1	0		1	2020-02-11	0	0	0	0				2020-02-11	0		0
11/03/2020	0	0	0	0	0	1	0	4	0	0	0	5								11/03/2020	0	0	0	2	1		3	11/03/2020	0	0	0	0				11/03/2020	1		1
2020-04-11	0	1	0	0	0	30	3	70	1	7	0	112								2020-04-11	3	22	7	37	9		78	2020-04-11	0	22	2	24				2020-04-11	10		10
2020-05-11	2	4	0	0	0	43	3	119	2	9	4	186								2020-05-11	5	31	12	68	17		133	2020-05-11	0	29	3	32				2020-05-11	19		19
lockdown												total								lockdown							total	lockdown				total				lockdown			total
posts																				posts								posts								posts
2019-12-11	0	0	0	0	0	0	0	0	0	0	0	0								2019-12-11	0	0	0	0	0		0	2019-12-11	0	0	0	0				2019-12-11	0		0
2020-01-11	0	0	0	0	0	0	0	0	0	0	0	0								2020-01-11	0	0	0	0	0		0	2020-01-11	0	0	0	0				2020-01-11	0		0
2020-02-11	0	0	0	0	0	0	0	1	0	0	0	1								2020-02-11	0	0	0	0	0		0	2020-02-11	0	0	0	0				2020-02-11	0		0
11/03/2020	0	0	0	0	0	0	0	1	0	0	0	1								11/03/2020	0	0	0	0	0		0	11/03/2020	0	0	0	0				11/03/2020	0		0
2020-04-11	1	10	0	0	0	7	0	73	0	3	0	94								2020-04-11	2	2	2	23	2		31	2020-04-11	0	4	0	4				2020-04-11	7		7
2020-05-11	2	15	0	0	0	12	3	143	0	6	1	182								2020-05-11	2	5	4	54	6		71	2020-05-11	0	10	0	10				2020-05-11	15		15
comments																				comments								comments								comments
2019-12-11	0	0	0	0	0	0	0	0	0	0	0	0								2019-12-11	0	0	0	0	0		0	2019-12-11	0	0	0	0				2019-12-11	0		0
2020-01-11	0	0	0	0	0	0	0	0	0	0	0	0								2020-01-11	0	0	0	0	0		0	2020-01-11	0	0	0	0				2020-01-11	0		0
2020-02-11	0	0	0	0	0	1	0	0	0	0	0	1								2020-02-11	0	0	0	0	1		1	2020-02-11	0	0	0	0				2020-02-11	0		0
11/03/2020	0	1	0	0	0	1	0	0	0	0	0	2								11/03/2020	0	0	0	0	1		1	11/03/2020	0	0	0	0				11/03/2020	0		0
2020-04-11	4	15	0	0	0	16	5	64	0	3	0	107								2020-04-11	4	11	0	25	7		47	2020-04-11	0	10	0	10				2020-04-11	10		10
2020-05-11	4	24	1	0	0	35	6	141	0	4	2	217								2020-05-11	5	19	4	56	17		101	2020-05-11	0	23	1	24				2020-05-11	18		18
Cognitive enhancers/PIEDS (for supplements/stacks see Therapeutic use group)																												Supplements
	r/adderall	r/afinil	r/anabolic	r/modafinil	r/Nootropics	r/steroids																							r/covid19stack **	r/StackAdvice	r/Supplements
members																												members
2019-12-11	34775	22947	1848	11971	206148	77093																						2019-12-11	0	31297	107951
2020-01-11	36177	23041	1885	12553	209564	79242																						2020-01-11	0	31739	111460
2020-02-11	38093	23184	1928	13210	213841	81743																						2020-02-11	0	32240	115825
11/03/2020	39677	23289	1974	13886	217189	83810																						11/03/2020	6	32777	119388
2020-04-11	41054	23334	2005	14608	219460	85416																						2020-04-11	229	33069	122852
2020-05-11	42896	23374	2028	15633	222373	87122																						2020-05-11	562	33569	126614
first post	2020-03-10	2020-03-19	/	2020-03-06	2020-01-24	2020-01-25																						first post	2020-03-18	2020-02-07	2020-01-28
first comment	2020-03-04	2020-03-19	/	2020-03-07	2020-02-06	2020-01-22																						first comment	2020-03-21	2020-02-25	2020-02-10
keywords																												keywords
covid												total																covid				total
posts																												posts
2019-12-11	0	0	0	0	0	0						0																2019-12-11	0	0	0	0
2020-01-11	0	0	0	0	0	0						0																2020-01-11	0	0	0	0
2020-02-11	0	0	0	0	0	0						0																2020-02-11	0	0	0	0
11/03/2020	0	0	0	0	7	1						8																11/03/2020	0	4	4	8
2020-04-11	18	1	0	3	41	10						73																2020-04-11	18	11	53	82
2020-05-11	32	1	0	5	52	13						103																2020-05-11	35	16	81	132
comments																												comments
2019-12-11	0	0	0	0	0	0						0																2019-12-11	0	0	0	0
2020-01-11	0	0	0	0	0	0						0																2020-01-11	0	0	0	0
2020-02-11	0	0	0	0	0	0						0																2020-02-11	0	0	0	0
11/03/2020	0	0	0	0	4	13						17																11/03/2020	0	5	19	24
2020-04-11	29	8	0	2	169	237						445																2020-04-11	8	17	240	265
2020-05-11	40	9	0	14	230	438						731																2020-05-11	47	31	323	401
coronavirus												total																coronavirus				total
posts																												posts
2019-12-11	0	0	0	0	0	0						0																2019-12-11	0	0	0	0
2020-01-11	0	0	0	0	0	0						0																2020-01-11	0	0	0	0
2020-02-11	0	0	0	0	2	3						5																2020-02-11	0	1	2	3
11/03/2020	2	1	0	2	8	7						20																11/03/2020	0	5	18	23
2020-04-11	13	3	0	3	28	14						61																2020-04-11	10	6	42	58
2020-05-11	17	3	0	4	34	17						75																2020-05-11	15	6	54	75
comments																												comments
2019-12-11	0	0	0	0	0	0						0																2019-12-11	0	0	0	0
2020-01-11	0	0	0	0	0	0						0																2020-01-11	0	0	0	0
2020-02-11	0	0	0	0	3	31						34																2020-02-11	0	0	1	1
11/03/2020	2	0	0	0	28	109						139																11/03/2020	0	2	44	46
2020-04-11	14	3	0	0	142	268						427																2020-04-11	5	9	159	173
2020-05-11	19	3	0	2	163	300						487																2020-05-11	9	10	187	206
corona												total																corona				total
posts																												posts
2019-12-11	0	0	0	0	0	0						0																2019-12-11	0	0	0	0
2020-01-11	0	0	0	0	0	0						0																2020-01-11	0	0	0	0
2020-02-11	0	0	0	0	0	0						0																2020-02-11	0	0	1	1
11/03/2020	0	0	0	0	2	1						3																11/03/2020	0	1	2	3
2020-04-11	4	0	0	2	10	2						18																2020-04-11	3	2	10	15
2020-05-11	6	1	0	3	13	3						26																2020-05-11	5	3	17	25
comments																												comments
2019-12-11	0	0	0	0	0	0						0																2019-12-11	0	0	0	0
2020-01-11	0	0	0	0	0	0						0																2020-01-11	0	0	0	0
2020-02-11	0	0	0	0	0	11						11																2020-02-11	0	0	0	0
11/03/2020	1	0	0	1	5	70						77																11/03/2020	0	0	13	13
2020-04-11	9	0	0	7	41	334						391																2020-04-11	0	2	50	52
2020-05-11	19	0	0	9	48	443						519																2020-05-11	2	10	61	73
quarantine												total																quarantine				total
posts																												posts
2019-12-11	0	0	0	0	0	0						0																2019-12-11	0	0	0	0
2020-01-11	0	0	0	0	0	0						0																2020-01-11	0	0	0	0
2020-02-11	0	0	0	0	0	0						0																2020-02-11	0	0	0	0
11/03/2020	0	0	0	0	0	0						0																11/03/2020	0	0	0	0
2020-04-11	11	0	0	1	1	3						16																2020-04-11	0	0	11	11
2020-05-11	28	0	0	2	11	5						46																2020-05-11	0	2	16	18
comments																												comments
2019-12-11	0	0	0	0	0	0						0																2019-12-11	0	0	0	0
2020-01-11	0	0	0	0	0	0						0																2020-01-11	0	0	0	0
2020-02-11	0	0	0	0	1	4						5																2020-02-11	0	0	0	0
11/03/2020	0	0	0	0	5	18						23																11/03/2020	0	0	1	1
2020-04-11	14	0	0	3	24	310						351																2020-04-11	0	5	16	21
2020-05-11	39	1	0	4	49	548						641																2020-05-11	0	12	32	44
pandemic												total																pandemic				total
posts																												posts
2019-12-11	0	0	0	0	0	0						0																2019-12-11	0	0	0	0
2020-01-11	0	0	0	0	0	0						0																2020-01-11	0	0	0	0
2020-02-11	0	0	0	0	0	0						0																2020-02-11	0	0	0	0
11/03/2020	0	0	0	0	0	0						0																11/03/2020	0	0	2	2
2020-04-11	11	0	0	2	4	0						17																2020-04-11	4	3	9	16
2020-05-11	23	0	0	3	8	0						34																2020-05-11	8	4	16	28
comments																												comments
2019-12-11	0	0	0	0	0	0						0																2019-12-11	0	0	0	0
2020-01-11	0	0	0	0	0	0						0																2020-01-11	0	0	0	0
2020-02-11	0	0	0	0	0	4						4																2020-02-11	0	0	0	0
11/03/2020	0	0	0	0	4	13						17																11/03/2020	0	0	3	3
2020-04-11	11	0	0	6	32	92						141																2020-04-11	1	4	29	34
2020-05-11	29	0	0	13	51	134						227																2020-05-11	2	12	37	51
lockdown												total																lockdown				total
posts																												posts
2019-12-11	0	0	0	0	0	0						0																2019-12-11	0	0	0	0
2020-01-11	0	0	0	0	0	0						0																2020-01-11	0	0	0	0
2020-02-11	0	0	0	0	0	0						0																2020-02-11	0	0	0	0
11/03/2020	0	0	0	0	0	0						0																11/03/2020	0	0	0	0
2020-04-11	6	0	0	1	1	1						9																2020-04-11	2	0	1	3
2020-05-11	6	0	0	5	4	1						16																2020-05-11	2	1	4	7
comments																												comments
2019-12-11	0	0	0	0	0	0						0																2019-12-11	0	0	0	0
2020-01-11	0	0	0	0	0	0						0																2020-01-11	0	0	0	0
2020-02-11	0	0	0	0	0	3						3																2020-02-11	0	0	0	0
11/03/2020	0	0	0	0	0	4						4																11/03/2020	0	0	0	0
2020-04-11	8	0	0	3	8	118						137																2020-04-11	0	3	4	7
2020-05-11	12	0	0	12	18	284						326																2020-05-11	0	5	10	15
Entactogens																												Entactogens
	r/MDMA																												r/mdmatherapy
members																												members
2019-12-11	95371																											2019-12-11	6856
2020-01-11	100301																											2020-01-11	7152
2020-02-11	105645																											2020-02-11	7470
11/03/2020	110128																											11/03/2020	7747
2020-04-11	114062																											2020-04-11	7957
2020-05-11	118103																											2020-05-11	8276
first post	2020-03-05																											first post	2020-03-12
first comment	2020-01-26																											first comment	2020-03-13
keywords																												keywords
covid												total																covid				total
posts																												posts
2019-12-11	0											0																2019-12-11	0			0
2020-01-11	0											0																2020-01-11	0			0
2020-02-11	0											0																2020-02-11	0			0
11/03/2020	3											3																11/03/2020	0			0
2020-04-11	23											23																2020-04-11	2			2
2020-05-11	36											36																2020-05-11	2			2
comments																												comments
2019-12-11	0											0																2019-12-11	0			0
2020-01-11	0											0																2020-01-11	0			0
2020-02-11	0											0																2020-02-11	0			0
11/03/2020	4											4																11/03/2020	0			0
2020-04-11	58											58																2020-04-11	1			1
2020-05-11	108											108																2020-05-11	3			3
coronavirus												total																coronavirus				total
posts																												posts
2019-12-11	0											0																2019-12-11	0			0
2020-01-11	0											0																2020-01-11	0			0
2020-02-11	0											0																2020-02-11	0			0
11/03/2020	4											4																11/03/2020	0			0
2020-04-11	28											28																2020-04-11	1			1
2020-05-11	34											34																2020-05-11	2			2
comments																												comments
2019-12-11	0											0																2019-12-11	0			0
2020-01-11	0											0																2020-01-11	0			0
2020-02-11	2											2																2020-02-11	0			0
11/03/2020	13											13																11/03/2020	0			0
2020-04-11	54											54																2020-04-11	6			6
2020-05-11	68											68																2020-05-11	7			7
corona												total																corona				total
posts																												posts
2019-12-11	0											0																2019-12-11	0			0
2020-01-11	0											0																2020-01-11	0			0
2020-02-11	0											0																2020-02-11	0			0
11/03/2020	2											2																11/03/2020	0			0
2020-04-11	50											50																2020-04-11	1			1
2020-05-11	62											62																2020-05-11	2			2
comments																												comments
2019-12-11	0											0																2019-12-11	0			0
2020-01-11	0											0																2020-01-11	0			0
2020-02-11	0											0																2020-02-11	0			0
11/03/2020	11											11																11/03/2020	0			0
2020-04-11	105											105																2020-04-11	3			3
2020-05-11	157											157																2020-05-11	5			5
quarantine												total																quarantine				total
posts																												posts
2019-12-11	0											0																2019-12-11	0			0
2020-01-11	0											0																2020-01-11	0			0
2020-02-11	0											0																2020-02-11	0			0
11/03/2020	0											0																11/03/2020	0			0
2020-04-11	116											116																2020-04-11	2			2
2020-05-11	192											192																2020-05-11	4			4
comments																												comments
2019-12-11	0																											2019-12-11	0			0
2020-01-11	0																											2020-01-11	0			0
2020-02-11	0																											2020-02-11	0			0
11/03/2020	0																											11/03/2020	0			0
2020-04-11	102																											2020-04-11	1			1
2020-05-11	185																											2020-05-11	1			1
pandemic												total																pandemic				total
posts																												posts
2019-12-11	0											0																2019-12-11	0			0
2020-01-11	0											0																2020-01-11	0			0
2020-02-11	0											0																2020-02-11	0			0
11/03/2020	0											0																11/03/2020	0			0
2020-04-11	10											102																2020-04-11	1			1
2020-05-11	21											185																2020-05-11	1			1
comments																												comments
2019-12-11	0											0																2019-12-11	0			0
2020-01-11	0											0																2020-01-11	0			0
2020-02-11	0											0																2020-02-11	0			0
11/03/2020	2											2																11/03/2020	0			0
2020-04-11	37											37																2020-04-11	2			2
2020-05-11	65											65																2020-05-11	2			2
lockdown												total																lockdown				total
posts																												posts
2019-12-11	0											0																2019-12-11	0			0
2020-01-11	0											0																2020-01-11	0			0
2020-02-11	0											0																2020-02-11	0			0
11/03/2020	0											0																11/03/2020	0			0
2020-04-11	32											32																2020-04-11	0			0
2020-05-11	69											69																2020-05-11	0			0
comments																												comments
2019-12-11	0											0																2019-12-11	0			0
2020-01-11	0											0																2020-01-11	0			0
2020-02-11	0											0																2020-02-11	0			0
11/03/2020	0											0																11/03/2020	0			0
2020-04-11	36											36																2020-04-11	0			0
2020-05-11	80											80																2020-05-11	0			0
Cannabimimetics													cannabimimetics							cannabimimetics
	r/cannabis	r/CannabisExtracts	r/noids	r/treedibles	r/trees									r/leaves	r/Petioles						r/Autoflowers	r/hempflowers	r/macrogrowery	r/MephHeads	r/microgrowery												r/vaporents
members													members							members																members
2019-12-11	95481	72511	2813	84807	1450686								2019-12-11	111635	36471					2019-12-11	31450	16604	26132	6382	178048											2019-12-11	129706
2020-01-11	98206	74369	2925	91357	1469677								2020-01-11	115736	40327					2020-01-11	34251	17627	28322	6812	182263											2020-01-11	131743
2020-02-11	101293	76567	3063	99889	1492531								2020-02-11	119136	45213					2020-02-11	37546	18787	30276	7467	187094											2020-02-11	134028
11/03/2020	103624	78254	3178	105044	1507009								11/03/2020	121688	48318					11/03/2020	41123	20043	31934	8743	191148											11/03/2020	135891
2020-04-11	106497	80313	3284	112332	1529659								2020-04-11	124554	49957					2020-04-11	45761	21455	33728	10551	198004											2020-04-11	138599
2020-05-11	109485	83064	3428	119910	1553229								2020-05-11	133309						2020-05-11	52773	23577	35498	13517	207194											2020-05-11	141758
first post	2020-02-27	2020-03-12	2020-02-15	2020-03-12	2020-01-24								first post	2020-02-04	2020-02-27					first post	2020-02-02	2020-03-01	2020-02-06	2020-03-09	2020-01-27											first post	2020-01-28
first comment	2020-02-09	2020-02-19	2020-03-21	2020-02-22	2020-01-23								first comment	2020-02-04	2020-02-10					first comment	2020-02-07	2020-02-15	2020-03-19	2020-02-01	2020-02-03											first comment	2020-02-03
keywords													keywords							keywords																keywords
covid												total	covid						total	covid							total									covid			total
posts													posts							posts																posts
2019-12-11	0	0	0	0	0							0	2019-12-11	0	0				0	2019-12-11	0	0	0	0	0		0									2019-12-11	0		0
2020-01-11	0	0	0	0	0							0	2020-01-11	0	0				0	2020-01-11	0	0	0	0	0		0									2020-01-11	0		0
2020-02-11	0	0	0	0	0							0	2020-02-11	0	0				0	2020-02-11	0	0	0	0	0		0									2020-02-11	0		0
11/03/2020	1	0	0	0	16							17	11/03/2020	1	1				2	11/03/2020	0	0	0	0	1		1									11/03/2020	1		1
2020-04-11	33	7	0	12	419							471	2020-04-11	93	27				120	2020-04-11	11	29	0	6	22		68									2020-04-11	35		35
2020-05-11	51	12	0	15	614							692	2020-05-11	187	48				235	2020-05-11	15	42	0	13	57		127									2020-05-11	56		56
comments													comments							comments																comments
2019-12-11	0	0	0	0	0							0	2019-12-11	0	0				0	2019-12-11	0	0	0	0	0		0									2019-12-11	0		0
2020-01-11	0	0	0	0	0							0	2020-01-11	0	0				0	2020-01-11	0	0	0	0	0		0									2020-01-11	0		0
2020-02-11	0	0	0	0	0							0	2020-02-11	0	0				0	2020-02-11	0	0	0	0	0		0									2020-02-11	0		0
11/03/2020	0	1	0	2	26							29	11/03/2020	3	0				3	11/03/2020	0	0	0	0	1		1									11/03/2020	5		5
2020-04-11	35	10	0	10	620							675	2020-04-11	135	41				176	2020-04-11	28	66	2	21	73		190									2020-04-11	119		119
2020-05-11	60	18	0	22	929							1029	2020-05-11	251	66				317	2020-05-11	64	72	7	53	171		367									2020-05-11	229		229
coronavirus												total	coronavirus						total	coronavirus							total									coronavirus			total
posts													posts							posts																posts
2019-12-11	0	0	0	0	0							0	2019-12-11	0	0				0	2019-12-11	0	0	0	0	0		0									2019-12-11	0		0
2020-01-11	0	0	0	0	0							0	2020-01-11	0	0				0	2020-01-11	0	0	0	0	0		0									2020-01-11	0		0
2020-02-11	0	0	0	0	8							8	2020-02-11	0	0				0	2020-02-11	0	0	0	0	5		5									2020-02-11	0		0
11/03/2020	5	0	1	0	66							72	11/03/2020	4	2				6	11/03/2020	0	2	0	0	9		11									11/03/2020	7		7
2020-04-11	45	3	1	6	303							358	2020-04-11	63	23				86	2020-04-11	2	12	0	3	14		31									2020-04-11	23		23
2020-05-11	22	5	2	7	386							422	2020-05-11	87	30				117	2020-05-11	3	18	0	3	19		43									2020-05-11	26		26
comments													comments							comments																comments
2019-12-11	0	0	0	0	0							0	2019-12-11	0	0					2019-12-11	0	0	0	0	0		0									2019-12-11	0		0
2020-01-11	0	0	0	0	0							0	2020-01-11	0	0					2020-01-11	0	0	0	0	0		0									2020-01-11	0		0
2020-02-11	1	0	0	0	19							20	2020-02-11	0	2					2020-02-11	0	0	0	1	12		13									2020-02-11	4		4
11/03/2020	2	4	0	1	109							116	11/03/2020	6	4					11/03/2020	7	12	0	2	40		61									11/03/2020	14		14
2020-04-11	19	7	0	13	437							476	2020-04-11	65	22					2020-04-11	21	52	1	7	76		157									2020-04-11	73		73
2020-05-11	66	14	0	20	537							637	2020-05-11	87	23					2020-05-11	30	69	2	8	91		200									2020-05-11	88		88
corona												total	corona						total	corona							total									corona			total
posts													posts							posts																posts
2019-12-11	0	0	0	0	0							0	2019-12-11	0	0				0	2019-12-11	0	0	0	0	0		0									2019-12-11	0		0
2020-01-11	0	0	0	0	0							0	2020-01-11	0	0				0	2020-01-11	0	0	0	0	0		0									2020-01-11	0		0
2020-02-11	0	0	0	0	4							4	2020-02-11	1	0				1	2020-02-11	1	0	1	0	1		3									2020-02-11	0		0
11/03/2020	0	0	2	0	30							32	11/03/2020	5	1				6	11/03/2020	4	1	1	0	6		12									11/03/2020	3		3
2020-04-11	4	5	3	2	323							337	2020-04-11	79	15				94	2020-04-11	11	18	1	3	25		58									2020-04-11	23		23
2020-05-11	9	8	3	2	408							430	2020-05-11	113	22				135	2020-05-11	14	27	1	5	34		81									2020-05-11	34		34
comments													comments							comments																comments
2019-12-11	0	0	0	0	0							0	2019-12-11	0	0				0	2019-12-11	0	0	0	0	0		0									2019-12-11	0		0
2020-01-11	0	0	0	0	0							0	2020-01-11	0	0				0	2020-01-11	0	0	0	0	0		0									2020-01-11	0		0
2020-02-11	0	0	0	0	15							15	2020-02-11	1	0				1	2020-02-11	5	0	1	0	3		9									2020-02-11	1		1
11/03/2020	5	6	0	0	121							132	11/03/2020	7	1				8	11/03/2020	12	1	1	1	26		41									11/03/2020	10		10
2020-04-11	22	18	1	7	667							715	2020-04-11	70	35				105	2020-04-11	46	37	2	6	84		175									2020-04-11	51		51
2020-05-11	29	24	2	12	868							935	2020-05-11	120	46				166	2020-05-11	61	53	2	16	122		254									2020-05-11	90		90
quarantine												total	quarantine						total	quarantine							total									quarantine			total
posts													posts							posts																posts
2019-12-11	0	0	0	0	0							0	2019-12-11	0	0				0	2019-12-11	0	0	0	0	0		0									2019-12-11	0		0
2020-01-11	0	0	0	1	0							1	2020-01-11	0	0				0	2020-01-11	0	0	0	0	0		0									2020-01-11	0		0
2020-02-11	0	0	0	1	1							2	2020-02-11	0	0				0	2020-02-11	0	0	0	0	0		0									2020-02-11	0		0
11/03/2020	0	0	0	1	5							6	11/03/2020	0	0				0	11/03/2020	0	0	0	0	0		0									11/03/2020	1		1
2020-04-11	3	22	0	48	1285							1358	2020-04-11	187	44				231	2020-04-11	27	36	1	14	109		187									2020-04-11	78		78
2020-05-11	6	39	1	73	1985							2104	2020-05-11	442	122				564	2020-05-11	44	54	1	27	175		301									2020-05-11	120		120
comments													comments							comments																comments
2019-12-11	0	0	0	0	0							0	2019-12-11	0	0				0	2019-12-11	0	0	0	0	0		0									2019-12-11	0		0
2020-01-11	0	0	0	0	0							0	2020-01-11	0	0				0	2020-01-11	0	0	0	0	0		0									2020-01-11	0		0
2020-02-11	0	0	0	0	0							0	2020-02-11	0	0				0	2020-02-11	0	0	0	0	0		0									2020-02-11	0		0
11/03/2020	0	0	0	0	11							11	11/03/2020	0	0				0	11/03/2020	0	1	0	0	11		12									11/03/2020	3		3
2020-04-11	8	14	0	44	1008							1074	2020-04-11	214	64				278	2020-04-11	28	46	1	22	118		215									2020-04-11	95		95
2020-05-11	9	23	0	83	1599							1714	2020-05-11	428	158				586	2020-05-11	76	77	1	41	223		418									2020-05-11	190		190
pandemic												total	pandemic						total	pandemic							total									pandemic			total
posts													posts							posts																posts
2019-12-11	0	0	0	0	0							0	2019-12-11	0	0				0	2019-12-11	0	0	0	0	0		0									2019-12-11	0		0
2020-01-11	0	0	0	0	0							0	2020-01-11	0	0				0	2020-01-11	0	0	0	0	0		0									2020-01-11	0		0
2020-02-11	0	0	0	0	0							0	2020-02-11	0	0				0	2020-02-11	0	0	0	0	0		0									2020-02-11	1		1
11/03/2020	0	0	0	0	3							3	11/03/2020	2	0				2	11/03/2020	0	0	0	0	0		0									11/03/2020	1		1
2020-04-11	9	2	1	7	175							194	2020-04-11	68	19				87	2020-04-11	3	18	0	1	13		35									2020-04-11	10		10
2020-05-11	16	3	1	7	302							329	2020-05-11	133	38				171	2020-05-11	9	23	0	2	26		60									2020-05-11	25		25
comments													comments							comments																comments
2019-12-11	0	0	0	0	0							0	2019-12-11	0	0				0	2019-12-11	0	0	0	0	0		0									2019-12-11	0		0
2020-01-11	0	0	0	0	0							0	2020-01-11	0	0				0	2020-01-11	0	0	0	0	0		0									2020-01-11	0		0
2020-02-11	0	0	0	0	0							0	2020-02-11	0	0				0	2020-02-11	0	0	0	0	1		1									2020-02-11	0		0
11/03/2020	0	0	0	0	12							12	11/03/2020	1	0				1	11/03/2020	0	0	0	0	1		1									11/03/2020	0		0
2020-04-11	18	4	1	9	357							389	2020-04-11	78	31				109	2020-04-11	6	33	3	10	34		86									2020-04-11	50		50
2020-05-11	31	6	1	14	556							608	2020-05-11	142	50				192	2020-05-11	25	70	4	11	69		179									2020-05-11	147		147
lockdown												total	lockdown						total	lockdown							total									lockdown			total
posts													posts							posts																posts
2019-12-11	0	0	0	0	0							0	2019-12-11	0	0				0	2019-12-11	0	0	0	0	0		0									2019-12-11	0		0
2020-01-11	0	0	0	0	0							0	2020-01-11	0	0				0	2020-01-11	0	0	0	0	0		0									2020-01-11	0		0
2020-02-11	0	0	0	0	0							0	2020-02-11	0	0				0	2020-02-11	0	0	0	0	0		0									2020-02-11	0		0
11/03/2020	0	0	0	0	2							2	11/03/2020	1	0				1	11/03/2020	0	0	0	0	0		0									11/03/2020	0		0
2020-04-11	1	2	0	15	250							268	2020-04-11	49	14				63	2020-04-11	9	10	1	3	22		45									2020-04-11	20		20
2020-05-11	2	4	0	23	370							399	2020-05-11	137	23				160	2020-05-11	13	11	1	4	40		69									2020-05-11	24		24
comments													comments							comments																comments
2019-12-11	0	0	0	0	0							0	2019-12-11	0	0				0	2019-12-11	0	0	0	0	0		0									2019-12-11	0		0
2020-01-11	0	0	0	0	0							0	2020-01-11	0	0				0	2020-01-11	0	0	0	0	0		0									2020-01-11	0		0
2020-02-11	0	0	0	0	0							0	2020-02-11	0	0				0	2020-02-11	0	0	0	1	1		2									2020-02-11	0		0
11/03/2020	0	0	0	0	4							4	11/03/2020	0	0				0	11/03/2020	0	0	0	1	2		3									11/03/2020	0		0
2020-04-11	5	5	0	11	274							295	2020-04-11	97	30				127	2020-04-11	21	7	2	10	63		103									2020-04-11	34		34
2020-05-11	6	7	0	19	458							490	2020-05-11	225	54				279	2020-05-11	58	19	3	17	131		228									2020-05-11	77		77
Dissociatives
	r/dissociatives	r/DissonautUniverse	r/ketamine	r/MXE	r/PCP
members
2019-12-11	3838	1357	25801	585	733
2020-01-11	4007	1404	27463	609	794
2020-02-11	4173	1447	29382	639	861
11/03/2020	4373	1521	30841	664	925
2020-04-11	4557	1583	32471	690	993
2020-05-11	4742	1650	34282	710	1060
first post	2020-02-02	2020-02-02	2020-01-23	/	2020-04-18
first comment	2020-02-01	2020-01-30	2020-02-02	/	2020-05-18
keywords
covid												total
posts
2019-12-11	0	0	0	0	0							0
2020-01-11	0	0	0	0	0							0
2020-02-11	0	0	0	0	0							0
11/03/2020	0	0	0	0	0							0
2020-04-11	0	1	11	0	0							12
2020-05-11	1	1	18	0	1							21
comments
2019-12-11	0	0	0	0	0							0
2020-01-11	0	0	0	0	0							0
2020-02-11	0	0	0	0	0							0
11/03/2020	0	0	0	0	0							0
2020-04-11	2	0	10	0	0							12
2020-05-11	2	1	28	0	0							31
coronavirus												total
posts
2019-12-11	0	0	0	0	0							0
2020-01-11	0	0	0	0	0							0
2020-02-11	1	1	1	0	0							3
11/03/2020	1	1	1	0	0							3
2020-04-11	2	1	12	0	0							15
2020-05-11	2	1	18	0	0							21
comments
2019-12-11	0	0	0	0	0							0
2020-01-11	0	0	0	0	0							0
2020-02-11	3	3	0	0	0							6
11/03/2020	5	3	2	0	0							10
2020-04-11	6	3	10	0	0							19
2020-05-11	7	3	16	0	0							26
corona												total
posts
2019-12-11	0	0	0	0	0							0
2020-01-11	0	0	0	0	0							0
2020-02-11	0	0	1	0	0							1
11/03/2020	0	0	3	0	0							3
2020-04-11	1	0	14	0	0							15
2020-05-11	1	0	19	0	0							20
comments
2019-12-11	0	0	0	0	0							0
2020-01-11	0	0	0	0	0							0
2020-02-11	1	0	2	0	0							3
11/03/2020	1	0	6	0	0							7
2020-04-11	3	0	35	0	0							38
2020-05-11	3	0	49	0	0							52
quarantine												total
posts
2019-12-11	0	0	0	0	0							0
2020-01-11	0	0	0	0	0							0
2020-02-11	0	0	0	0	0							0
11/03/2020	0	0	0	0	0							0
2020-04-11	1	0	61	0	0							62
2020-05-11	1	0	95	0	0							96
comments
2019-12-11	0	0	0	0	0							0
2020-01-11	0	0	0	0	0							0
2020-02-11	1	1	0	0	0							2
11/03/2020	1	1	0	0	0							2
2020-04-11	1	1	35	0	0							37
2020-05-11	2	1	67	0	0							70
pandemic												total
posts
2019-12-11	0	0	0	0	0							0
2020-01-11	0	0	0	0	0							0
2020-02-11	0	0	0	0	0							0
11/03/2020	0	0	0	0	0							0
2020-04-11	2	0	2	0	0							4
2020-05-11	2	0	5	0	0							7
comments
2019-12-11	0	0	0	0	0							0
2020-01-11	0	0	0	0	0							0
2020-02-11	0	0	0	0	0							0
11/03/2020	0	0	0	0	0							0
2020-04-11	0	0	7	0	0							7
2020-05-11	2	0	13	0	0							15
lockdown												total
posts
2019-12-11	0	0	0	0	0							0
2020-01-11	0	0	0	0	0							0
2020-02-11	0	0	0	0	0							0
11/03/2020	0	0	0	0	0							0
2020-04-11	0	0	21	0	0							21
2020-05-11	0	0	35	0	0							35
comments
2019-12-11	0	0	0	0	0							0
2020-01-11	0	0	0	0	0							0
2020-02-11	0	0	0	0	0							0
11/03/2020	0	0	0	0	0							0
2020-04-11	0	1	20	0	0							21
2020-05-11	0	1	43	0	0							44
Stimulants														Cocaine, crystal meth, and other stimulants
	r/cocaine	r/meth	r/stims											r/stopspeeding
members													members
2019-12-11	52934	15830	55355										2019-12-11	7597
2020-01-11	55490	16753	57727										2020-01-11	8008
2020-02-11	58122	17878	59719										2020-02-11	8465
11/03/2020	60616	19476	62057										11/03/2020	9114
2020-04-11	63512	20525	64081										2020-04-11	9559
2020-05-11	66890	21953	66175										2020-05-11	10056
first post	2020-02-03	2020-02-25	2020-02-18										first post	2020-03-12
first comment	2020-01-26	2020-02-15	2020-02-18										first comment	2020-03-06
keywords													keywords
covid												total	covid						total
posts													posts
2019-12-11	0	0	0									0	2019-12-11	0					0
2020-01-11	0	0	0									0	2020-01-11	0					0
2020-02-11	0	0	0									0	2020-02-11	0					0
11/03/2020	1	0	1									2	11/03/2020	0					0
2020-04-11	49	12	28									89	2020-04-11	8					8
2020-05-11	93	23	46									162	2020-05-11	19					19
comments													comments
2019-12-11	0	0	0									0	2019-12-11	0					0
2020-01-11	0	0	0									0	2020-01-11	0					0
2020-02-11	0	0	0									0	2020-02-11	0					0
11/03/2020	1	0	2									3	11/03/2020	0					0
2020-04-11	46	21	32									99	2020-04-11	6					6
2020-05-11	106	59	69									234	2020-05-11	13					13
coronavirus												total	coronavirus						total
posts													posts
2019-12-11	0	0	0									0	2019-12-11	0					0
2020-01-11	0	0	0									0	2020-01-11	0					0
2020-02-11	1	0	0									1	2020-02-11	0					0
11/03/2020	7	3	1									11	11/03/2020	0					0
2020-04-11	35	13	35									83	2020-04-11	7					7
2020-05-11	55	18	45									118	2020-05-11	9					9
comments													comments
2019-12-11	0	0	0									0	2019-12-11	0					0
2020-01-11	0	0	0									0	2020-01-11	0					0
2020-02-11	0	0	0									0	2020-02-11	0					0
11/03/2020	6	3	6									15	11/03/2020	3					3
2020-04-11	51	21	47									119	2020-04-11	8					8
2020-05-11	60	19	63									142	2020-05-11	10					10
corona												total	corona						total
posts													posts
2019-12-11	0	0	0									0	2019-12-11	0					0
2020-01-11	0	0	0									0	2020-01-11	0					0
2020-02-11	0	0	0									0	2020-02-11	0					0
11/03/2020	1	2	1									4	11/03/2020	0					0
2020-04-11	56	17	36									109	2020-04-11	9					9
2020-05-11	78	23	48									149	2020-05-11	11					11
comments													comments
2019-12-11	0	0	0									0	2019-12-11	0					0
2020-01-11	0	0	0									0	2020-01-11	0					0
2020-02-11	6	0	0									6	2020-02-11	0					0
11/03/2020	13	5	2									20	11/03/2020	0					0
2020-04-11	93	42	48									183	2020-04-11	6					6
2020-05-11	126	67	78									271	2020-05-11	9					9
quarantine												total	quarantine						total
posts													posts
2019-12-11	0	0	0									0	2019-12-11	0					0
2020-01-11	0	0	0									0	2020-01-11	0					0
2020-02-11	0	0	0									0	2020-02-11	0					0
11/03/2020	0	1	0									1	11/03/2020	0					0
2020-04-11	248	15	43									306	2020-04-11	8					8
2020-05-11	377	38	85									500	2020-05-11	31					31
comments													comments
2019-12-11	0	0	0									0	2019-12-11	0					0
2020-01-11	0	0	0									0	2020-01-11	0					0
2020-02-11	1	0	0									1	2020-02-11	0					0
11/03/2020	2	0	0									2	11/03/2020	0					0
2020-04-11	110	14	43									167	2020-04-11	20					20
2020-05-11	257	45	108									410	2020-05-11	34					34
pandemic												total	pandemic						total
posts													posts
2019-12-11	0	0	0									0	2019-12-11	0					0
2020-01-11	0	0	0									0	2020-01-11	0					0
2020-02-11	0	0	0									0	2020-02-11	0					0
11/03/2020	0	1	0									1	11/03/2020	0					0
2020-04-11	25	10	11									46	2020-04-11	6					6
2020-05-11	34	14	14									62	2020-05-11	13					13
comments													comments
2019-12-11	0	0	0									0	2019-12-11	0					0
2020-01-11	0	0	0									0	2020-01-11	0					0
2020-02-11	0	0	0									0	2020-02-11	0					0
11/03/2020	0	2	1									3	11/03/2020	0					0
2020-04-11	17	14	25									56	2020-04-11	6					6
2020-05-11	46	29	42									117	2020-05-11	11					11
lockdown												total	lockdown						total
posts													posts
2019-12-11	0	0	0									0	2019-12-11	0					0
2020-01-11	0	0	0									0	2020-01-11	0					0
2020-02-11	0	0	0									0	2020-02-11	0					0
11/03/2020	0	0	0									0	11/03/2020	0					0
2020-04-11	72	7	11									90	2020-04-11	4					4
2020-05-11	122	10	23									155	2020-05-11	7					7
comments													comments
2019-12-11	0	0	0									0	2019-12-11	0					0
2020-01-11	0	0	0									0	2020-01-11	0					0
2020-02-11	0	0	0									0	2020-02-11	0					0
11/03/2020	0	0	0									0	11/03/2020	0					0
2020-04-11	70	16	12									98	2020-04-11	3					3
2020-05-11	149	32	25									206	2020-05-11	9					9
Opioidergics														Vicodin, Percocet, heroin, and other opioid painkillers
	r/fentanyl	r/kratom	r/opiates	r/PoppyTea										r/HeroinHeroines	/r/Methadone	r/opiatesrecovery	r/quittingkratom	r/suboxone
members													members
2019-12-11	1976	83084	88356	4638									2019-12-11	1871	4930	22272	10830	5330
2020-01-11	2059	85020	90521	4798									2020-01-11	1966	5140	23176	11320	5681
2020-02-11	2158	87318	92376	4886									2020-02-11	2072	5395	23607	11899	6042
11/03/2020	2282	89293	94502	4993									11/03/2020	2174	5813	24032	12452	6381
2020-04-11	2385	91142	96778	5098									2020-04-11	2279	6503	24489	12855	6773
2020-05-11	2464	92846	98812	5219									2020-05-11	2415	7029	24925	13456	7182
first post	2020-03-17	2020-01-24	2020-01-28	2020-04-07									first post	2020-03-16	2020-02-02	2020-03-04	2020-02-01	2020-02-26
first comment	2020-02-29	2020-01-24	2020-01-27	2020-04-01									first comment	2020-03-29	2020-02-02	2020-02-28	2020-02-09	2020-02-03
keywords													keywords
covid												total	covid						total
posts													posts
2019-12-11	0	0	0	0								0	2019-12-11	0	0	0	0	0	0
2020-01-11	0	0	0	0								0	2020-01-11	0	0	0	0	0	0
2020-02-11	0	0	0	0								0	2020-02-11	0	0	0	0	0	0
11/03/2020	0	2	1	0								3	11/03/2020	0	2	0	1	0	3
2020-04-11	1	45	74	3								123	2020-04-11	0	58	41	32	20	151
2020-05-11	2	65	118	3								188	2020-05-11	1	89	71	53	41	255
comments													comments
2019-12-11	0	0	0	0								0	2019-12-11	0	0	0	0	0	0
2020-01-11	0	0	0	0								0	2020-01-11	0	0	0	0	0	0
2020-02-11	0	0	0	0								0	2020-02-11	0	0	0	0	0	0
11/03/2020	0	18	10	0								28	11/03/2020	0	7	2	5	8	22
2020-04-11	4	200	187	0								391	2020-04-11	0	229	83	100	66	478
2020-05-11	5	311	338	1								655	2020-05-11	5	387	156	161	145	854
coronavirus												total	coronavirus						total
posts													posts
2019-12-11	0	0	0	0								0	2019-12-11	0	0	0	0	0	0
2020-01-11	0	0	0	0								0	2020-01-11	0	0	0	0	0	0
2020-02-11	0	5	4	0								9	2020-02-11	0	2	0	0	0	2
11/03/2020	0	24	12	1								37	11/03/2020	0	7	1	2	0	10
2020-04-11	1	64	60	1								126	2020-04-11	0	43	19	25	0	87
2020-05-11	1	68	76	1								146	2020-05-11	0	60	24	30	2	116
comments													comments
2019-12-11	0	0	0	0								0	2019-12-11	0	0	0	0	0	0
2020-01-11	0	0	0	0								0	2020-01-11	0	0	0	0	0	0
2020-02-11	0	12	6	0								18	2020-02-11	0	8	0	0	0	8
11/03/2020	1	60	32	0								93	11/03/2020	0	17	5	12	0	34
2020-04-11	2	168	136	3								309	2020-04-11	0	96	36	65	0	197
2020-05-11	2	190	179	5								376	2020-05-11	0	117	46	78	5	246
corona												total	corona						total
posts													posts
2019-12-11	0	0	0	0								0	2019-12-11	0	0	0	0	0	0
2020-01-11	0	0	0	0								0	2020-01-11	0	0	0	0	0	0
2020-02-11	0	2	3	0								5	2020-02-11	0	0	0	0	0	0
11/03/2020	0	14	11	0								25	11/03/2020	0	3	0	4	0	7
2020-04-11	0	50	71	0								121	2020-04-11	0	35	18	29	6	88
2020-05-11	0	55	88	1								144	2020-05-11	0	41	25	37	9	112
comments													comments
2019-12-11	0	0	0	0								0	2019-12-11	0	0	0	0	0	0
2020-01-11	0	0	0	0								0	2020-01-11	0	0	0	0	0	0
2020-02-11	0	5	7	0								12	2020-02-11	0	0	0	1	0	1
11/03/2020	1	24	22	1								48	11/03/2020	0	5	1	13	6	25
2020-04-11	2	109	179	2								292	2020-04-11	0	84	41	65	14	204
2020-05-11	3	135	245	2								385	2020-05-11	0	108	54	80	20	262
quarantine												total	quarantine						total
posts													posts
2019-12-11	0	0	0	0								0	2019-12-11	0	0	0	0	0	0
2020-01-11	0	0	0	0								0	2020-01-11	0	0	0	0	0	0
2020-02-11	0	0	1	0								1	2020-02-11	0	1	0	0	0	1
11/03/2020	0	3	80	0								83	11/03/2020	0	4	0	0	1	5
2020-04-11	0	31	156	1								188	2020-04-11	2	25	26	67	18	138
2020-05-11	1	43	198	1								243	2020-05-11	3	29	55	120	31	238
comments													comments
2019-12-11	0	0	0	0								0	2019-12-11	0	0	0	0	0	0
2020-01-11	0	0	0	0								0	2020-01-11	0	0	0	0	0	0
2020-02-11	0	0	1	0								1	2020-02-11	0	1	0	1	0	2
11/03/2020	1	3	5	0								9	11/03/2020	0	12	12	47	4	75
2020-04-11	2	41	115	0								158	2020-04-11	3	69	64	107	40	283
2020-05-11	2	63	188	0								253	2020-05-11	4	84	124	189	79	480
pandemic												total	pandemic						total
posts													posts
2019-12-11	0	0	0	0								0	2019-12-11	0	0	0	0	0	0
2020-01-11	0	0	0	0								0	2020-01-11	0	0	0	0	0	0
2020-02-11	0	0	0	0								0	2020-02-11	0	0	0	0	0	0
11/03/2020	0	1	1	0								2	11/03/2020	0	0	1	0	1	2
2020-04-11	1	10	31	0								42	2020-04-11	0	28	20	29	12	89
2020-05-11	2	14	46	2								64	2020-05-11	0	41	35	47	22	145
comments													comments
2019-12-11	0	0	0	0								0	2019-12-11	0	0	0	0	0	0
2020-01-11	0	0	0	0								0	2020-01-11	0	0	0	0	0	0
2020-02-11	0	1	5	0								6	2020-02-11	0	1	0	0	0	1
11/03/2020	0	4	89	0								93	11/03/2020	0	6	2	2	2	12
2020-04-11	0	43	173	0								216	2020-04-11	0	159	42	54	42	297
2020-05-11	1	57	227	0								285	2020-05-11	0	265	89	93	97	544
lockdown												total	lockdown						total
posts													posts
2019-12-11	0	0	0	0								0	2019-12-11	0	0	0	0	0	0
2020-01-11	0	0	0	0								0	2020-01-11	0	0	0	0	0	0
2020-02-11	0	0	0	0								0	2020-02-11	0	0	0	0	0	0
11/03/2020	0	0	0	0								0	11/03/2020	0	0	0	0	0	0
2020-04-11	0	13	22	0								35	2020-04-11	0	4	15	9	8	36
2020-05-11	0	24	38	0								62	2020-05-11	0	12	22	18	11	63
comments													comments
2019-12-11	0	0	0	0								0	2019-12-11	0	0	0	0	0	0
2020-01-11	0	0	0	0								0	2020-01-11	0	0	0	0	0	0
2020-02-11	0	0	1	0								1	2020-02-11	0	0	0	0	0	0
11/03/2020	0	2	6	0								8	11/03/2020	0	1	0	1	0	2
2020-04-11	0	35	64	1								100	2020-04-11	0	35	32	22	13	102
2020-05-11	0	55	101	1								157	2020-05-11	0	42	68	40	24	174
Gabaergics, gabapentinoids and various psychotropic medications
	gabaergics and gabapentinoids				prescribed drugs/OTC									Miscellaneous sedatives
	r/benzodiazepines	r/phenibut	r/gabagoodness*		r/ambien	r/DPH	r/dxm	r/MAOIs *	r/MemantineHCl					r/quittingphenibut	r/benzorecovery
members													members
2019-12-11	42140	23669	2151		65191	4918	22300	526	896				2019-12-11	2355	8907
2020-01-11	43908	23959	2424		83129	5793	23495	584	946				2020-01-11	2605	9502
2020-02-11	45858	24369	2682		88466	6341	24775	653	997				2020-02-11	2806	10007
11/03/2020	47666	24692	2944		90907	7051	25858	708	1045				11/03/2020	3001	10603
2020-04-11	50266	25030	3299		94429	7796	27202	761	1088				2020-04-11	3166	11210
2020-05-11	52695	25374	3684		95273	8417	28370	864	1155				2020-05-11	3338	12169
first post	2020-01-28	2020-02-28	2020-03-19		2020-03-13	2020-03-14	2020-02-01	2020-03-12	2020-03-31				first post	2020-03-13	2020-02-07
first comment	2020-01-26	2020-02-05	2020-03-14		2020-02-09	2020-03-12	2020-01-28	2020-02-28	2020-03-20				first comment	2020-02-01	2020-03-03
keywords													keywords
covid												total	covid						total
posts													posts
2019-12-11	0	0	0		0	0	0	0	0			0	2019-12-11	0	0				0
2020-01-11	0	0	0		0	0	0	0	0			0	2020-01-11	0	0				0
2020-02-11	0	0	0		0	0	0	0	0			0	2020-02-11	0	0				0
11/03/2020	0	2	0		0	0	2	0	0			4	11/03/2020	0	0				0
2020-04-11	43	6	4		3	2	13	5	0			76	2020-04-11	6	14				20
2020-05-11	75	8	4		3	3	18	6	2			119	2020-05-11	12	28				40
comments													comments
2019-12-11	0	0	0		0	0	0	0	0			0	2019-12-11	0	0				0
2020-01-11	0	0	0		0	0	0	0	0			0	2020-01-11	0	0				0
2020-02-11	0	0	0		0	0	0	0	0			0	2020-02-11	0	0				0
11/03/2020	2	2	0		0	0	1	0	0			5	11/03/2020	0	0				0
2020-04-11	58	6	10		4	2	17	10	1			108	2020-04-11	6	19				25
2020-05-11	126	13	12		4	4	46	22	2			229	2020-05-11	12	46				58
coronavirus												total	coronavirus						total
posts													posts
2019-12-11	0	0	0		0	0	0	0	0			0	2019-12-11	0	0				0
2020-01-11	0	0	0		0	0	0	0	0			0	2020-01-11	0	0				0
2020-02-11	1	0	0		0	0	2	0	0			3	2020-02-11	0	0				0
11/03/2020	4	1	0		0	0	5	0	0			10	11/03/2020	0	1				1
2020-04-11	38	2	3		3	6	24	1	1			78	2020-04-11	10	9				19
2020-05-11	48	4	3		4	6	32	1	1			99	2020-05-11	12	17				29
comments													comments
2019-12-11	0	0	0		0	0	0	0	0			0	2019-12-11	0	0				0
2020-01-11	0	0	0		0	0	0	0	0			0	2020-01-11	0	0				0
2020-02-11	2	1	0		0	0	3	0	0			6	2020-02-11	0	0				0
11/03/2020	11	3	0		1	0	12	1	0			28	11/03/2020	2	0				2
2020-04-11	45	15	5		3	6	32	11	2			119	2020-04-11	6	31				37
2020-05-11	56	15	5		3	7	52	11	2			151	2020-05-11	8	36				44
corona												total	corona						total
posts													posts
2019-12-11	0	0	0		0	0	0	0	0			0	2019-12-11	0	0				0
2020-01-11	0	0	0		0	0	0	0	0			0	2020-01-11	0	0				0
2020-02-11	0	0	0		0	0	2	0	0			2	2020-02-11	0	0				0
11/03/2020	3	0	0		0	0	5	0	0			8	11/03/2020	0	1				1
2020-04-11	56	5	2		1	4	29	2	0			99	2020-04-11	4	6				10
2020-05-11	78	6	3		1	5	42	2	0			137	2020-05-11	5	8				13
comments													comments
2019-12-11	0	0	0		0	0	0	0	0			0	2019-12-11	0	0				0
2020-01-11	0	0	0		0	0	0	0	0			0	2020-01-11	0	0				0
2020-02-11	1	1	0		1	0	2	0	0			5	2020-02-11	0	0				0
11/03/2020	11	2	0		1	0	9	1	0			24	11/03/2020	0	1				1
2020-04-11	92	13	5		3	7	46	4	1			171	2020-04-11	4	22				26
2020-05-11	130	18	8		5	9	80	6	1			257	2020-05-11	7	26				33
quarantine												total	quarantine						total
posts													posts
2019-12-11	0	0	0		0	0	0	0	0			0	2019-12-11	0	0				0
2020-01-11	0	0	0		0	0	0	0	0			0	2020-01-11	0	0				0
2020-02-11	0	0	0		0	0	0	0	0			0	2020-02-11	0	0				0
11/03/2020	0	0	0		0	0	0	0	0			0	11/03/2020	0	0				0
2020-04-11	205	3	10		4	24	52	1	0			299	2020-04-11	0	11				11
2020-05-11	349	10	14		6	37	81	1	1			499	2020-05-11	1	25				26
comments													comments
2019-12-11	0	0	0		0	0	0	0	0			0	2019-12-11	0	0				0
2020-01-11	0	0	0		0	0	0	0	0			0	2020-01-11	0	0				0
2020-02-11	0	0	0		0	0	1	0	0			1	2020-02-11	0	0				0
11/03/2020	0	1	0		0	0	3	0	0			4	11/03/2020	0	0				0
2020-04-11	115	5	17		5	19	48	3	0			212	2020-04-11	8	15				23
2020-05-11	230	15	22		9	36	99	5	1			417	2020-05-11	11	49				60
pandemic												total	pandemic						total
posts													posts
2019-12-11	0	0	0		0	0	0	0	0			0	2019-12-11	0	0				0
2020-01-11	0	0	0		0	0	0	0	0			0	2020-01-11	0	0				0
2020-02-11	0	0	0		0	0	0	0	0			0	2020-02-11	0	0				0
11/03/2020	0	1	0		0	0	0	0	0			1	11/03/2020	0	0				0
2020-04-11	25	2	1		0	2	4	0	0			34	2020-04-11	4	6				10
2020-05-11	35	3	1		1	3	7	1	0			51	2020-05-11	5	11				16
comments													comments
2019-12-11	0	0	0		0	0	0	0	0			0	2019-12-11	0	0				0
2020-01-11	0	0	0		0	0	0	0	0			0	2020-01-11	0	0				0
2020-02-11	0	0	0		0	0	1	0	0			1	2020-02-11	0	0				0
11/03/2020	0	1	0		0	0	1	1	0			3	11/03/2020	0	0				0
2020-04-11	205	9	4		0	0	19	4	0			241	2020-04-11	4	14				18
2020-05-11	349	13	5		2	0	27	8	0			404	2020-05-11	9	35				44
lockdown												total	lockdown						total
posts													posts
2019-12-11	0	0	0		0	0	0	0	0			0	2019-12-11	0	0				0
2020-01-11	0	0	0		0	0	0	0	0			0	2020-01-11	0	0				0
2020-02-11	0	0	0		0	0	0	0	0			0	2020-02-11	0	0				0
11/03/2020	0	0	0		0	0	0	0	0			0	11/03/2020	0	0				0
2020-04-11	38	4	2		2	2	7	2	0			57	2020-04-11	2	4				6
2020-05-11	62	5	4		2	3	10	2	0			88	2020-05-11	2	6				8
comments													comments
2019-12-11	0	0	0		0	0	0	0	0			0	2019-12-11	0	0				0
2020-01-11	0	0	0		0	0	0	0	0			0	2020-01-11	0	0				0
2020-02-11	0	0	0		0	0	0	0	0			0	2020-02-11	0	0				0
11/03/2020	0	0	0		0	0	0	0	0			0	11/03/2020	0	0				0
2020-04-11	63	9	2		2	2	3	3	1			85	2020-04-11	2	8				10
2020-05-11	97	14	10		2	2	9	4	1			139	2020-05-11	5	16				21
Research chemicals
	r/researchchemicals	r/Opioid_RCs **	r/ObscureDrugs *
members
2019-12-11	69465	825	3979
2020-01-11	72015	980	4222
2020-02-11	74766	1228	4629
11/03/2020	77371	1542	5018
2020-04-11	80009	1750	5428
2020-05-11	83554	1952	6200
first post	2020-01-23	2020-02-10	2020-03-16
first comment	2020-01-24	2020-02-04	2020-02-09
keywords
covid												total
posts
2019-12-11	0	0	0									0
2020-01-11	0	0	0									0
2020-02-11	0	0	0									0
11/03/2020	1	0	0									1
2020-04-11	34	3	1									38
2020-05-11	59	3	1									63
comments
2019-12-11	0	0	0									0
2020-01-11	0	0	0									0
2020-02-11	0	0	0									0
11/03/2020	9	0	0									9
2020-04-11	111	1	1									113
2020-05-11	193	5	3									201
coronavirus												total
posts
2019-12-11	0	0	0									0
2020-01-11	0	0	0									0
2020-02-11	2	0	0									2
11/03/2020	9	0	0									9
2020-04-11	29	0	0									29
2020-05-11	33	0	0									33
comments
2019-12-11	0	0	0									0
2020-01-11	0	0	0									0
2020-02-11	12	0	0									12
11/03/2020	35	2	0									37
2020-04-11	84	2	1									87
2020-05-11	112	3	1									116
corona												total
posts
2019-12-11	0	0	0									0
2020-01-11	0	0	0									0
2020-02-11	4	1	0									5
11/03/2020	9	1	0									10
2020-04-11	26	1	0									27
2020-05-11	32	1	0									33
comments
2019-12-11	0	0	0									0
2020-01-11	0	0	0									0
2020-02-11	7	2	0									9
11/03/2020	26	5	0									31
2020-04-11	86	7	1									94
2020-05-11	111	9	4									124
quarantine												total
posts
2019-12-11	0	0	0									0
2020-01-11	0	0	0									0
2020-02-11	0	0	0									0
11/03/2020	1	0	0									1
2020-04-11	36	1	1									38
2020-05-11	54	2	2									58
comments
2019-12-11	0	0	0									0
2020-01-11	0	0	0									0
2020-02-11	1	0	0									1
11/03/2020	7	0	0									7
2020-04-11	74	2	4									80
2020-05-11	137	3	10									150
pandemic												total
posts
2019-12-11	0	0	0									0
2020-01-11	0	0	0									0
2020-02-11	0	0	0									0
11/03/2020	0	0	0									0
2020-04-11	9	0	0									9
2020-05-11	15	1	1									17
comments
2019-12-11	0	0	0									0
2020-01-11	0	0	0									0
2020-02-11	1	0	0									1
11/03/2020	3	0	0									3
2020-04-11	30	0	2									32
2020-05-11	61	1	3									65
lockdown												total
posts
2019-12-11	0	0	0									0
2020-01-11	0	0	0									0
2020-02-11	0	0	0									0
11/03/2020	0	0	0									0
2020-04-11	7	0	0									7
2020-05-11	12	0	0									12
comments
2019-12-11	0	0	0									0
2020-01-11	0	0	0									0
2020-02-11	0	0	0									0
11/03/2020	1	0	0									1
2020-04-11	22	0	1									23
2020-05-11	44	2	1									47
Other subbreddits included among Drugs A-Z by redditors
	r/DrugCombos	r/TheSaviorSubstances
members
2019-12-11	1022	60
2020-01-11	1063	66
2020-02-11	1119	74
11/03/2020	1158	79
2020-04-11	1199	86
2020-05-11	1244	93
first post	/	/
first comment	/	/
keywords
covid												total
posts
2019-12-11	0	0										0
2020-01-11	0	0										0
2020-02-11	0	0										0
11/03/2020	0	0										0
2020-04-11	0	0										0
2020-05-11	0	0										0
comments
2019-12-11	0	0										0
2020-01-11	0	0										0
2020-02-11	0	0										0
11/03/2020	0	0										0
2020-04-11	0	0										0
2020-05-11	0	0										0
coronavirus												total
posts
2019-12-11	0	0										0
2020-01-11	0	0										0
2020-02-11	0	0										0
11/03/2020	0	0										0
2020-04-11	0	0										0
2020-05-11	0	0										0
comments
2019-12-11	0	0										0
2020-01-11	0	0										0
2020-02-11	0	0										0
11/03/2020	0	0										0
2020-04-11	0	0										0
2020-05-11	0	0										0
corona												total
posts
2019-12-11	0	0										0
2020-01-11	0	0										0
2020-02-11	0	0										0
11/03/2020	0	0										0
2020-04-11	0	0										0
2020-05-11	0	0										0
comments
2019-12-11	0	0										0
2020-01-11	0	0										0
2020-02-11	0	0										0
11/03/2020	0	0										0
2020-04-11	0	0										0
2020-05-11	0	0										0
quarantine												total
posts
2019-12-11	0	0										0
2020-01-11	0	0										0
2020-02-11	0	0										0
11/03/2020	0	0										0
2020-04-11	0	0										0
2020-05-11	0	0										0
comments
2019-12-11	0	0										0
2020-01-11	0	0										0
2020-02-11	0	0										0
11/03/2020	0	0										0
2020-04-11	0	0										0
2020-05-11	0	0										0
pandemic												total
posts
2019-12-11	0	0										0
2020-01-11	0	0										0
2020-02-11	0	0										0
11/03/2020	0	0										0
2020-04-11	0	0										0
2020-05-11	0	0										0
comments
2019-12-11	0	0										0
2020-01-11	0	0										0
2020-02-11	0	0										0
11/03/2020	0	0										0
2020-04-11	0	0										0
2020-05-11	0	0										0
lockdown												total
posts
2019-12-11	0	0										0
2020-01-11	0	0										0
2020-02-11	0	0										0
11/03/2020	0	0										0
2020-04-11	0	0										0
2020-05-11	0	0										0
comments
2019-12-11	0	0										0
2020-01-11	0	0										0
2020-02-11	0	0										0
11/03/2020	0	0										0
2020-04-11	0	0										0
2020-05-11	0	0										0
Beverages, brews and infusions														Miscellaneous
	r/Ayahuasca	r/Kava	r/Kombucha	r/lean										r/decaf
members													members
2019-12-11	24665	9892	35487	17463									2019-12-11	9675
2020-01-11	25600	10195	36671	18965									2020-01-11	10256
2020-02-11	26777	10630	38482	20255									2020-02-11	10630
11/03/2020	27741	10943	40420	21106									11/03/2020	11253
2020-04-11	28438	11233	43339	22439									2020-04-11	11784
2020-05-11	29227	11589	45932	23883									2020-05-11	12624
first post	2020-03-12	2020-03-15	2020-03-06	2020-03-02									first post	2020-02-29
first comment	2020-02-29	2020-03-15	2020-01-27	2020-01-26									first comment	2020-02-13
keywords													keywords
covid												total	covid						total
posts													posts
2019-12-11	0	0	0	0								0	2019-12-11	0					0
2020-01-11	0	0	0	0								0	2020-01-11	0					0
2020-02-11	0	0	0	0								0	2020-02-11	0					0
11/03/2020	0	0	0	0								0	11/03/2020	1					1
2020-04-11	7	4	6	14								31	2020-04-11	6					6
2020-05-11	12	7	11	22								52	2020-05-11	13					13
comments													comments
2019-12-11	0	0	0	0								0	2019-12-11	0					0
2020-01-11	0	0	0	0								0	2020-01-11	0					0
2020-02-11	0	0	0	0								0	2020-02-11	0					0
11/03/2020	1	0	0	1								2	11/03/2020	0					0
2020-04-11	14	7	7	10								38	2020-04-11	16					16
2020-05-11	34	13	12	23								82	2020-05-11	24					24
coronavirus												total	coronavirus						total
posts													posts
2019-12-11	0	0	0	0								0	2019-12-11	0					0
2020-01-11	0	0	0	0								0	2020-01-11	0					0
2020-02-11	0	0	0	0								0	2020-02-11	0					0
11/03/2020	0	0	1	1								2	11/03/2020	0					0
2020-04-11	7	2	7	9								25	2020-04-11	4					4
2020-05-11	8	2	7	10								27	2020-05-11	7					7
comments													comments
2019-12-11	0	0	0	0								0	2019-12-11	0					0
2020-01-11	0	0	0	0								0	2020-01-11	0					0
2020-02-11	0	0	0	2								2	2020-02-11	0					0
11/03/2020	2	0	0	6								8	11/03/2020	0					0
2020-04-11	29	5	4	17								55	2020-04-11	5					5
2020-05-11	31	5	5	18								59	2020-05-11	10					10
corona												total	corona						total
posts													posts
2019-12-11	0	0	0	0								0	2019-12-11	0					0
2020-01-11	0	0	0	0								0	2020-01-11	0					0
2020-02-11	0	0	0	0								0	2020-02-11	0					0
11/03/2020	0	0	0	4								4	11/03/2020	0					0
2020-04-11	2	2	3	40								47	2020-04-11	2					2
2020-05-11	3	9	3	43								58	2020-05-11	4					4
comments													comments
2019-12-11	0	0	0	0								0	2019-12-11	0					0
2020-01-11	0	0	0	0								0	2020-01-11	0					0
2020-02-11	0	0	1	0								1	2020-02-11	0					0
11/03/2020	0	0	2	9								11	11/03/2020	1					1
2020-04-11	15	4	7	45								71	2020-04-11	11					11
2020-05-11	22	4	7	66								99	2020-05-11	17					17
quarantine												total	quarantine						total
posts													posts
2019-12-11	0	0	0	0								0	2019-12-11	0					0
2020-01-11	0	0	0	0								0	2020-01-11	0					0
2020-02-11	0	0	0	0								0	2020-02-11	0					0
11/03/2020	0	0	0	0								0	11/03/2020	0					0
2020-04-11	1	2	24	40								67	2020-04-11	11					11
2020-05-11	2	2	36	70								110	2020-05-11	26					26
comments													comments
2019-12-11	0	0	0	0								0	2019-12-11	0					0
2020-01-11	0	0	0	0								0	2020-01-11	0					0
2020-02-11	0	0	0	0								0	2020-02-11	0					0
11/03/2020	1	0	0	2								3	11/03/2020	0					0
2020-04-11	5	3	15	30								53	2020-04-11	29					29
2020-05-11	10	8	27	56								101	2020-05-11	57					57
pandemic												total	pandemic						total
posts													posts
2019-12-11	0	0	0	0								0	2019-12-11	0					0
2020-01-11	0	0	0	0								0	2020-01-11	0					0
2020-02-11	0	0	0	0								0	2020-02-11	0					0
11/03/2020	0	0	0	0								0	11/03/2020	0					0
2020-04-11	4	0	1	2								7	2020-04-11	3					3
2020-05-11	6	0	4	2								12	2020-05-11	7					7
comments													comments
2019-12-11	0	0	0	0								0	2019-12-11	0					0
2020-01-11	0	0	0	0								0	2020-01-11	0					0
2020-02-11	0	0	0	0								0	2020-02-11	0					0
11/03/2020	0	0	0	0								0	11/03/2020	4					4
2020-04-11	18	5	5	8								36	2020-04-11	12					12
2020-05-11	26	5	10	11								52	2020-05-11	16					16
lockdown												total	lockdown						total
posts													posts
2019-12-11	0	0	0	0								0	2019-12-11	0					0
2020-01-11	0	0	0	0								0	2020-01-11	0					0
2020-02-11	0	0	0	0								0	2020-02-11	0					0
11/03/2020	0	0	0	0								0	11/03/2020	0					0
2020-04-11	1	4	7	15								27	2020-04-11	2					2
2020-05-11	1	5	11	21								38	2020-05-11	9					9
comments													comments
2019-12-11	0	0	0	0								0	2019-12-11	0					0
2020-01-11	0	0	0	0								0	2020-01-11	0					0
2020-02-11	0	0	0	0								0	2020-02-11	0					0
11/03/2020	0	0	1	0								1	11/03/2020	0					0
2020-04-11	5	3	6	5								19	2020-04-11	7					7
2020-05-11	9	5	11	18								43	2020-05-11	17					17
Other psychoactive substances (cigarettes, alcohol)														Nicotine		Alcohol
	r/Cigarettes	r/alcohol												r/stopsmoking	r/StopDipping	r/alcoholism
members													members
2019-12-11	29037	69331											2019-12-11	97339	1086	27261
2020-01-11	30066	70283											2020-01-11	99344	1106	28289
2020-02-11	31344	71233											2020-02-11	101546	1128	29298
11/03/2020	32477	71932											11/03/2020	102758	1152	30096
2020-04-11	33915	73075											2020-04-11	104473	1162	30695
2020-05-11	35574	74183											2020-05-11	105809	1176	31447
first post	2020-01-24	2020-01-25											first post	2020-02-03	/	2020-03-13
first comment	2020-02-05	2020-01-26											first comment	2020-02-07	2020-04-07	2020-03-11
keywords													keywords
covid												total	covid						total
posts													posts
2019-12-11	0	0										0	2019-12-11	0	0	0			0
2020-01-11	0	0										0	2020-01-11	0	0	0			0
2020-02-11	0	0										0	2020-02-11	0	0	0			0
11/03/2020	1	0										1	11/03/2020	6	0	0			6
2020-04-11	15	9										24	2020-04-11	173	0	32			205
2020-05-11	39	22										61	2020-05-11	225	0	70			295
comments													comments
2019-12-11	0	0										0	2019-12-11	0	0	0			0
2020-01-11	0	0										0	2020-01-11	0	0	0			0
2020-02-11	0	0										0	2020-02-11	0	0	0			0
11/03/2020	0	2										2	11/03/2020	6	0	1			7
2020-04-11	19	8										27	2020-04-11	175	0	22			197
2020-05-11	55	16										71	2020-05-11	295	0	51			346
coronavirus												total	coronavirus						total
posts													posts
2019-12-11	0	0										0	2019-12-11	0	0	0			0
2020-01-11	0	0										0	2020-01-11	0	0	0			0
2020-02-11	2	1										3	2020-02-11	1	0	0			1
11/03/2020	3	4										7	11/03/2020	18	0	0			18
2020-04-11	21	12										33	2020-04-11	75	0	22			97
2020-05-11	29	18										47	2020-05-11	91	0	33			124
comments													comments
2019-12-11	0	0										0	2019-12-11	0	0	0			0
2020-01-11	0	0										0	2020-01-11	0	0	0			0
2020-02-11	0	2										2	2020-02-11	1	0	0			1
11/03/2020	3	6										9	11/03/2020	17	0	0			17
2020-04-11	40	9										49	2020-04-11	66	0	15			81
2020-05-11	56	12										68	2020-05-11	90	0	21			111
corona												total	corona						total
posts													posts
2019-12-11	0	0										0	2019-12-11	0	0	0			0
2020-01-11	0	0										0	2020-01-11	0	0	0			0
2020-02-11	0	0										0	2020-02-11	1	0	0			1
11/03/2020	0	1										1	11/03/2020	7	0	0			7
2020-04-11	21	13										34	2020-04-11	59	0	9			68
2020-05-11	23	20										43	2020-05-11	81	0	19			100
comments													comments
2019-12-11	0	0										0	2019-12-11	0	0	0			0
2020-01-11	0	0										0	2020-01-11	0	0	0			0
2020-02-11	3	20										23	2020-02-11	0	0	0			0
11/03/2020	7	28										35	11/03/2020	10	0	0			10
2020-04-11	40	49										89	2020-04-11	84	1	12			97
2020-05-11	53	57										110	2020-05-11	109	1	22			132
quarantine												total	quarantine						total
posts													posts
2019-12-11	0	0										0	2019-12-11	0	0	0			0
2020-01-11	0	0										0	2020-01-11	0	0	0			0
2020-02-11	0	0										0	2020-02-11	0	0	0			0
11/03/2020	0	0										0	0	1	0	0			1
2020-04-11	71	52										123	2020-04-11	93	0	34			127
2020-05-11	130	97										227	2020-05-11	160	0	99			259
comments													comments
2019-12-11	0	0										0	2019-12-11	0	0	0			0
2020-01-11	0	0										0	2020-01-11	0	0	0			0
2020-02-11	0	0										0	2020-02-11	0	0	0			0
11/03/2020	0	0										0	11/03/2020	2	0	0			2
2020-04-11	22	28										50	2020-04-11	78	0	32			110
2020-05-11	54	49										103	2020-05-11	153	1	86			240
pandemic												total	pandemic						total
posts													posts
2019-12-11	0	0										0	2019-12-11	0	0	0			0
2020-01-11	0	0										0	2020-01-11	0	0	0			0
2020-02-11	0	0										0	2020-02-11	0	0	0			0
11/03/2020	0	0										0	0	0	0	0			0
2020-04-11	12	1										13	2020-04-11	53	0	17			70
2020-05-11	17	3										20	2020-05-11	91	0	34			125
comments													comments
2019-12-11	0	0										0	2019-12-11	0	0	0			0
2020-01-11	0	0										0	2020-01-11	0	0	0			0
2020-02-11	0	0										0	2020-02-11	0	0	0			0
11/03/2020	0	0										0	11/03/2020	1	0	0			1
2020-04-11	16	7										23	2020-04-11	57	0	29			86
2020-05-11	36	7										43	2020-05-11	119	0	54			173
lockdown												total	lockdown						total
posts													posts
2019-12-11	0	0										0	2019-12-11	0	0	0			0
2020-01-11	0	0										0	2020-01-11	0	0	0			0
2020-02-11	0	0										0	2020-02-11	0	0	0			0
11/03/2020	0	0										0	11/03/2020	0	0	0			0
2020-04-11	21	7										28	2020-04-11	52	0	8			60
2020-05-11	45	15										60	2020-05-11	115	0	26			141
comments													comments
2019-12-11	0	0										0	2019-12-11	0	0	0			0
2020-01-11	0	0										0	2020-01-11	0	0	0			0
2020-02-11	0	0										0	2020-02-11	0	0	0			0
11/03/2020	0	0										0	11/03/2020	0	0	0			0
2020-04-11	27	6										33	2020-04-11	60	0	7			67
2020-05-11	63	14										77	2020-05-11	151	0	19			170
Generic														Recovery																				Drug-induced disorders
														r/addiction							r/druggardening													r/HPPD			r/DrugNerds	r/Psychonaut
													members							members													members			members
													2019-12-11	36484						2019-12-11	35646												2019-12-11	2738		2019-12-11	88195	249642
													2020-01-11	37588						2020-01-11	36924												2020-01-11	2912		2020-01-11	90105	256118
													2020-02-11	38697						2020-02-11	38173												2020-02-11	3124		2020-02-11	92306	263331
													11/03/2020	39587						11/03/2020	39197												11/03/2020	3349		11/03/2020	94610	268928
													2020-04-11	40433						2020-04-11	40753												2020-04-11	3702		2020-04-11	96462	275580
													2020-05-11	41615						2020-05-11	42855												2020-05-11	3967		2020-05-11	98619	282864
													first post	2020-01-28						first post	2020-01-27												first post	2020-03-03		first post	2020-03-10	2020-02-10
													first comment	2020-02-04						first comment	2020-02-07												first comment	2020-02-27		first comment	2020-03-11	2020-01-27
													keywords							keywords													keywords			keywords
													covid						total	covid							total						covid		total	covid			total
													posts							posts													posts			posts
													2019-12-11	0					0	2019-12-11	0						0						2019-12-11	0	0	2019-12-11	0	0	0
													2020-01-11	0					0	2020-01-11	0						0						2020-01-11	0	0	2020-01-11	0	0	0
													2020-02-11	0					0	2020-02-11	0						0						2020-02-11	0	0	2020-02-11	0	0	0
													11/03/2020	0					0	11/03/2020	0						0						11/03/2020	0	0	11/03/2020	0	1	1
													2020-04-11	34					34	2020-04-11	1						1						2020-04-11	3	3	2020-04-11	9	28	37
													2020-05-11	66					66	2020-05-11	2						2						2020-05-11	6	6	2020-05-11	16	64	80
													comments							comments													comments			comments
													2019-12-11	0					0	2019-12-11	0						0						2019-12-11	0	0	2019-12-11	0	0	0
													2020-01-11	0					0	2020-01-11	0						0						2020-01-11	0	0	2020-01-11	0	0	0
													2020-02-11	0					0	2020-02-11	0						0						2020-02-11	0	0	2020-02-11	0	0	0
													11/03/2020	1					1	11/03/2020	0						0						11/03/2020	0	0	11/03/2020	8	1	9
													2020-04-11	31					31	2020-04-11	2						2						2020-04-11	5	5	2020-04-11	32	53	85
													2020-05-11	65					65	2020-05-11	5						5						2020-05-11	7	7	2020-05-11	44	94	138
													coronavirus						total	coronavirus							total						coronavirus		total	coronavirus			total
													posts							posts													posts			posts
													2019-12-11	0					0	2019-12-11	0						0						2019-12-11	0	0	2019-12-11	0	0	0
													2020-01-11	0					0	2020-01-11	0						0						2020-01-11	0	0	2020-01-11	0	0	0
													2020-02-11	0					0	2020-02-11	0						0						2020-02-11	0	0	2020-02-11	0	0	0
													11/03/2020	0					0	11/03/2020	1						1						11/03/2020	1	1	11/03/2020	1	4	5
													2020-04-11	31					31	2020-04-11	5						5						2020-04-11	5	5	2020-04-11	8	48	56
													2020-05-11	42					42	2020-05-11	5						5						2020-05-11	5	5	2020-05-11	14	61	75
													comments							comments													comments			comments
													2019-12-11	0					0	2019-12-11	0						0						2019-12-11	0	0	2019-12-11	0	0	0
													2020-01-11	0					0	2020-01-11	0						0						2020-01-11	0	0	2020-01-11	0	0	0
													2020-02-11	0					0	2020-02-11	0						0						2020-02-11	0	0	2020-02-11	0	3	3
													11/03/2020	0					0	11/03/2020	1						1						11/03/2020	4	4	11/03/2020	3	15	18
													2020-04-11	16					16	2020-04-11	2						2						2020-04-11	13	13	2020-04-11	16	79	95
													2020-05-11	27					27	2020-05-11	3						3						2020-05-11	16	16	2020-05-11	24	105	129
													corona						total	corona							total						corona		total	corona			total
													posts							posts													posts			posts
													2019-12-11	0					0	2019-12-11	0						0						2019-12-11	0	0	2019-12-11	0	0	0
													2020-01-11	0					0	2020-01-11	0						0						2020-01-11	0	0	2020-01-11	0	0	0
													2020-02-11	1					1	2020-02-11	0						0						2020-02-11	0	0	2020-02-11	0	0	0
													11/03/2020	1					1	11/03/2020	0						0						11/03/2020	1	1	11/03/2020	0	1	1
													2020-04-11	15					15	2020-04-11	1						1						2020-04-11	2	2	2020-04-11	1	26	27
													2020-05-11	25					25	2020-05-11	2						2						2020-05-11	6	6	2020-05-11	2	41	43
													comments							comments													comments			comments
													2019-12-11	0					0	2019-12-11	0						0						2019-12-11	0	0	2019-12-11	0	0	0
													2020-01-11	0					0	2020-01-11	0						0						2020-01-11	0	0	2020-01-11	0	0	0
													2020-02-11	1					1	2020-02-11	0						0						2020-02-11	0	0	2020-02-11	0	2	2
													11/03/2020	1					1	11/03/2020	1						1						11/03/2020	0	0	11/03/2020	1	8	9
													2020-04-11	10					10	2020-04-11	2						2						2020-04-11	5	5	2020-04-11	4	62	66
													2020-05-11	25					25	2020-05-11	3						3						2020-05-11	9	9	2020-05-11	4	95	99
													quarantine						total	quarantine							total						quarantine		total	quarantine			total
													posts							posts													posts			posts
													2019-12-11	0					0	2019-12-11	0						0						2019-12-11	0	0	2019-12-11	0	0	0
													2020-01-11	0					0	2020-01-11	0						0						2020-01-11	0	0	2020-01-11	0	0	0
													2020-02-11	0					0	2020-02-11	0						0						2020-02-11	0	0	2020-02-11	0	0	0
													11/03/2020	0					0	11/03/2020	0						0						11/03/2020	0	0	11/03/2020	0	2	2
													2020-04-11	43					43	2020-04-11	8						8						2020-04-11	5	5	2020-04-11	2	46	48
													2020-05-11	93					93	2020-05-11	17						17						2020-05-11	11	11	2020-05-11	7	96	103
													comments							comments													comments			comments
													2019-12-11	0					0	2019-12-11	0						0						2019-12-11	0	0	2019-12-11	0	0	0
													2020-01-11	0					0	2020-01-11	1						1						2020-01-11	0	0	2020-01-11	0	0	0
													2020-02-11	0					0	2020-02-11	1						1						2020-02-11	0	0	2020-02-11	0	0	0
													11/03/2020	0					0	11/03/2020	1						1						11/03/2020	0	0	11/03/2020	0	0	0
													2020-04-11	37					37	2020-04-11	9						9						2020-04-11	3	3	2020-04-11	6	81	87
													2020-05-11	93					93	2020-05-11	14						14						2020-05-11	15	15	2020-05-11	9	134	143
													pandemic						total	pandemic							total						pandemic		total	pandemic			total
													posts							posts													posts			posts
													2019-12-11	0					0	2019-12-11	0						0						2019-12-11	0	0	2019-12-11	0	0	0
													2020-01-11	0					0	2020-01-11	0						0						2020-01-11	0	0	2020-01-11	0	0	0
													2020-02-11	0					0	2020-02-11	0						0						2020-02-11	0	0	2020-02-11	0	0	0
													11/03/2020	0					0	11/03/2020	0						0						11/03/2020	0	0	11/03/2020	1	1	2
													2020-04-11	16					16	2020-04-11	0						0						2020-04-11	2	2	2020-04-11	4	19	23
													2020-05-11	34					34	2020-05-11	0						0						2020-05-11	6	6	2020-05-11	7	29	36
													comments							comments													comments			comments
													2019-12-11	0					0	2019-12-11	0						0						2019-12-11	0	0	2019-12-11	0	0	0
													2020-01-11	0					0	2020-01-11	0						0						2020-01-11	0	0	2020-01-11	0	0	0
													2020-02-11	0					0	2020-02-11	0						0						2020-02-11	0	0	2020-02-11	0	0	0
													11/03/2020	0					0	11/03/2020	0						0						11/03/2020	0	0	11/03/2020	0	0	0
													2020-04-11	23					23	2020-04-11	2						2						2020-04-11	4	4	2020-04-11	3	73	76
													2020-05-11	56					56	2020-05-11	4						4						2020-05-11	4	4	2020-05-11	4	114	118
													lockdown						total	lockdown							total						lockdown		total	lockdown			total
													posts							posts													posts			posts
													2019-12-11	0					0	2019-12-11	0						0						2019-12-11	0	0	2019-12-11	0	0	0
													2020-01-11	0					0	2020-01-11	0						0						2020-01-11	0	0	2020-01-11	0	0	0
													2020-02-11	0					0	2020-02-11	0						0						2020-02-11	0	0	2020-02-11	0	0	0
													11/03/2020	0					0	11/03/2020	0						0						11/03/2020	0	0	11/03/2020	0	2	2
													2020-04-11	21					21	2020-04-11	0						0						2020-04-11	1	1	2020-04-11	0	6	6
													2020-05-11	47					47	2020-05-11	2						2						2020-05-11	3	3	2020-05-11	0	20	20
													comments							comments													comments			comments
													2019-12-11	0					0	2019-12-11	0						0						2019-12-11	0	0	2019-12-11	0	0	0
													2020-01-11	0					0	2020-01-11	0						0						2020-01-11	0	0	2020-01-11	0	0	0
													2020-02-11	0					0	2020-02-11	0						0						2020-02-11	0	0	2020-02-11	0	1	1
													11/03/2020	0					0	11/03/2020	0						0						11/03/2020	0	0	11/03/2020	0	1	1
													2020-04-11	33					33	2020-04-11	6						6						2020-04-11	5	5	2020-04-11	1	25	26
													2020-05-11	56					56	2020-05-11	9						9						2020-05-11	14	14	2020-05-11	3	47	50
r/Drugs
	r/Drugs
members
2019-12-11	619563
2020-01-11	631677
2020-02-11	644469
11/03/2020	654559
2020-04-11	666395
2020-05-11	676581
first post	2020-01-26
first comment	2020-01-26
keywords
covid												total
posts
2019-12-11	0											0
2020-01-11	0											0
2020-02-11	0											0
11/03/2020	3											3
2020-04-11	164											164
2020-05-11	258											258
comments
2019-12-11	0											0
2020-01-11	0											0
2020-02-11	0											0
11/03/2020	5											5
2020-04-11	320											320
2020-05-11	538											538
coronavirus												total
posts
2019-12-11	0											0
2020-01-11	0											0
2020-02-11	12											12
11/03/2020	30											30
2020-04-11	174											174
2020-05-11	227											227
comments
2019-12-11	0											0
2020-01-11	0											0
2020-02-11	8											8
11/03/2020	37											37
2020-04-11	314											314
2020-05-11	449											449
corona												total
posts
2019-12-11	0											0
2020-01-11	0											0
2020-02-11	1											1
11/03/2020	13											13
2020-04-11	151											151
2020-05-11	210											210
comments
2019-12-11	0											0
2020-01-11	0											0
2020-02-11	8											8
11/03/2020	35											35
2020-04-11	271											271
2020-05-11	402											402
quarantine												total
posts
2019-12-11	0											0
2020-01-11	0											0
2020-02-11	0											0
11/03/2020	4											4
2020-04-11	344											344
2020-05-11	556											556
comments
2019-12-11	0											0
2020-01-11	0											0
2020-02-11	0											0
11/03/2020	11											11
2020-04-11	329											329
2020-05-11	645											645
pandemic												total
posts
2019-12-11	0											0
2020-01-11	0											0
2020-02-11	0											0
11/03/2020	4											4
2020-04-11	73											73
2020-05-11	127											127
comments
2019-12-11	0											0
2020-01-11	0											0
2020-02-11	0											0
11/03/2020	5											5
2020-04-11	106											106
2020-05-11	195											195
lockdown												total
posts
2019-12-11	0											0
2020-01-11	0											0
2020-02-11	0											0
11/03/2020	1											1
2020-04-11	107											107
2020-05-11	148											148
comments
2019-12-11	0											0
2020-01-11	0											0
2020-02-11	0											0
11/03/2020	3											3
2020-04-11	106											106
2020-05-11	239											239
Legend
Colours
psychedelics
cognitive enhancers/PIEDS/supplements
entactogens
cannabimimetics
dissociatives
stimulants
opioids
gabaergics, gabapentinoids and various psychotropic medications
research chemicals
other subbreddits included among Drugs A-Z by redditors
beverages, brews and infusions
other psychoactive substances (cigarettes, alcohol)
Asterisks/slashes
* incuded in this group by the Authors; listed in other groups by the redditors
** included in this group by the Authors; not among the r/Drugs related subreddits
/ impossible to obtain/no data
Bold = first posts/comments; about/more 100K members; banned
Italics (numbers) = approximate data (approximated to the nearest available data as close as possible to day 11 of each month/corrected value; approxomated excluding irrelevant posts/comments)
