# Supplementary material for: COVID-19 Pandemic Impact on Substance Misuse: A Social Media Listening, Mixed Method Analysis
Source: Brain Sci. 2021 Jul 9;11(7):907. doi: 10.3390/brainsci11070907 (PMC8303488; doi:10.3390/brainsci11070907)
Supplement: Supplementary file 1 [file brainsci-11-00907-s001.zip › Table S3 Covid-19 impact on substance misuse psychonauts.xlsx]

## Sheet: Table S3
Table S3. Selected subreddits for quantitative analysis.
Table S3a. Selected r/Drugs related subreddits screened for quantitative analysis.
Pharmacological classes	Drugs A-Z subreddit groups by classes											total
psychedelics	r/1P_LSD	r/2cb	r/4acodmt	r/5MeODMT	r/aMT	r/DMT	r/LSA	r/LSD	r/mescaline	r/PsilocybinMushrooms	r/Salvia	11
cognitive enhancers/PIEDS/supplements	r/adderall	r/afinil	r/anabolic	r/modafinil	r/Nootropics	r/steroids						6
entactogens	r/MDMA											1
cannabimimetics	r/cannabis	r/CannabisExtracts	r/noids	r/treedibles	r/trees							5
dissociatives	r/dissociatives	r/DissonautUniverse	r/ketamine	r/MXE	r/PCP							5
stimulants	r/cocaine	r/meth	r/stims									3
opioids	r/fentanyl	r/kratom	r/opiates	r/PoppyTea								4
gabaergics, gabapentinoids and various psychotropic medications	r/benzodiazepines	r/phenibut	r/ambien	r/DPH	r/dxm	r/gabagoodness*	r/MAOIs*	r/MemantineHCl				8
research chemicals	r/researchchemicals	r/Opioid_RCs**	r/ObscureDrugs*									3
other subbreddits included among Drugs A-Z by redditors	r/DrugCombos	r/TheSaviorSubstances										2
beverages, brews and infusions	r/Ayahuasca	r/Kava	r/Kombucha	r/lean								4
other psychoactive substances (cigarettes, alcohol)	r/Cigarettes	r/alcohol										2
	Addiction/Recovery by pharmacological classes
psychedelics												0
cognitive enhancers/PIEDS/supplements												0
entactogens												0
cannabimimetics	r/leaves	r/Petioles										2
dissociatives												0
stimulants	r/stopspeeding											1
opioids	r/HeroinHeroines	/r/Methadone	r/opiatesrecovery	r/quittingkratom	r/suboxone							5
gabaergics, gabapentinoids and various psychotropic medications	r/quittingphenibut	r/benzorecovery										2
research chemicals												0
other subbreddits included among Drugs A-Z by redditors												0
beverages, brews and infusions	r/decaf											1
other psychoactive substances (cigarettes, alcohol)	r/stopsmoking	r/StopDipping	r/alcoholism									3
generic subreddits	r/addiction											1
	Cultivation by pharmacological classes
psychedelics	r/DMTGuide	r/MushroomGrowers	r/shroomers	r/shrooms	r/Mycology							5
cognitive enhancers/PIEDS/supplements												0
entactogens												0
cannabimimetics	r/Autoflowers	r/hempflowers	r/macrogrowery	r/MephHeads	r/microgrowery							5
dissociatives												0
stimulants												0
opioids												0
gabaergics, gabapentinoids and various psychotropic medications												0
research chemicals												0
other subbreddits included among Drugs A-Z by redditors												0
beverages, brews and infusions												0
other psychoactive substances (cigarettes, alcohol)												0
generic subreddits	r/druggardening											1
	Therapeutic use group by pharmacological classes
psychedelics	r/AnAnswerToHeal	r/microdosing	r/PsychedelicTherapy									3
cognitive enhancers/PIEDS/supplements	r/covid19stack **	r/StackAdvice	r/Supplements									3
entactogens	r/mdmatherapy											1
cannabimimetics												0
dissociatives												0
stimulants												0
opioids												0
gabaergics, gabapentinoids and various psychotropic medications												0
research chemicals												0
other subbreddits included among Drugs A-Z by redditors												0
beverages, brews and infusions												0
other psychoactive substances (cigarettes, alcohol)												0
	Harm Reduction
Drug-induced disorders	r/HPPD											1
	Discussion by pharmacological classes
generic subreddits	r/DrugNerds	r/Psychonaut										2
psychedelics	r/Psychedelics											1
cannabimimetics	r/vaporents											1
												92
Table S3b. Number of r/Drugs related selected subreddits for quantitative analysis.
Pharmacological classes	Drugs A-Z	Addiction/Recovery	Cultivation	Therapeutic use	Harm Reduction	Discussion	total
psychedelics	11	0	5	3	0	1	20
cognitive enhancers/PIEDS/supplements	6	0	0	3	0	0	9
entactogens	1	0	0	1	0	0	2
cannabimimetics	5	2	5	0	0	1	13
dissociatives	5	0	0	0	0	0	5
stimulants	3	1	0	0	0	0	4
opioids	4	5	0	0	0	0	9
gabaergics, gabapentinoids and various psychotropic medications	8	2	0	0	0	0	10
research chemicals	3	0	0	0	0	0	3
other subbreddits included among Drugs A-Z by redditors	2	0	0	0	0	0	2
beverages, brews and infusions	4	1	0	0	0	0	5
other psychoactive substances (cigarettes, alcohol)	2	3	0	0	0	0	5
generic subreddits and drug-induced disorders	0	1	1	0	1	2	5
total (excluding r/Drugs)	54	15	11	7	1	4	92
Table S3c. Number of r/Drugs related selected subreddits' posts/comments in each pharmacological class.
Pharmacological classes	total posts 11/12/2019	total posts 11/01/2020	total posts 11/02/2020	total posts 11/03/2020	total posts 11/04/2020	total posts 11/05/2020	total comments 11/12/2019	total comments 11/01/2020	total comments 11/02/2020	total comments 11/03/2020	total comments 11/04/2020	total comments 11/05/2020
psychedelics	0	0	6	53	1520	2364	0	1	40	169	1910	3238
cognitive enhancers/PIEDS/supplements	0	0	9	67	379	585	0	0	58	364	2444	3721
entactogens	0	0	0	9	358	589	0	0	2	30	303	496
cannabimimetics	0	1	24	186	4280	6724	0	0	66	467	5767	9420
dissociatives	0	0	4	6	129	200	0	0	11	19	134	238
stimulants	0	0	1	19	765	1236	0	6	21	215	862	1186
opioids	0	0	18	177	1224	1776	0	0	50	449	3027	4671
gabaergics, gabapentinoids and various psychotropic medications	0	0	5	25	719	1125	0	0	13	67	1075	1857
research chemicals	0	0	7	21	148	216	0	0	23	88	429	703
other subbreddits included among Drugs A-Z by redditors	0	0	0	0	0	0	0	0	0	0	0	0
beverages, brews and infusions	0	0	0	7	232	363	0	0	3	30	352	577
other psychoactive substances (cigarettes, alcohol)	0	0	5	41	882	1502	0	0	26	83	909	1644
generic subreddits	0	0	1	17	390	729	0	1	8	46	643	1102
total	0	1	80	628	11026	17409	0	8	321	2027	17855	28853
Table S3d. Number of r/Drugs posts/comments.
	total posts 11/12/2019	total posts 11/01/2020	total posts 11/02/2020	total posts 11/03/2020	total posts 11/04/2020	total posts 11/05/2020	total comments 11/12/2019	total comments 11/01/2020	total comments 11/02/2020	total comments 11/03/2020	total comments 11/04/2020	total comments 11/05/2020
r/Drugs	0	0	13	55	1013	1526	0	0	16	96	1446	2468
Table S3e. Total posts/comments.
	total posts 11/12/2019	total posts 11/01/2020	total posts 11/02/2020	total posts 11/03/2020	total posts 11/04/2020	total posts 11/05/2020	total comments 11/12/2019	total comments 11/01/2020	total comments 11/02/2020	total comments 11/03/2020	total comments 11/04/2020	total comments 11/05/2020
r/Drugs + r/Drugs related subreddits	0	1	80	628	11026	17409	0	8	321	2027	17855	28853
	0	0	13	55	1013	1526	0	0	16	96	1446	2468
total	0	1	93	683	12039	18935	0	8	337	2123	19301	31321
Legend
Colours
psychedelics
cognitive enhancers/PIEDS/supplements
entactogens
cannabimimetics
dissociatives
stimulants
opioids
gabaergics, gabapentinoids and various psychotropic medications
research chemicals
other subbreddits included among Drugs A-Z by redditors
beverages, brews and infusions
other psychoactive substances (cigarettes, alcohol)
Asterisks/slashes
* incuded in this group by the Authors; listed in other groups by the redditors
** included in this group by the Authors; not among the r/Drugs related subreddits
/ impossible to obtain/no data
Bold = first posts/comments; about/more 100K members; banned
Italics (numbers) = approximate data (approximated to the nearest available data as close as possible to day 11 of each month/corrected value; approxomated excluding irrelevant posts/comments)
Table S3 summary. Posts/comments Covid-19 related keywords trends from December 2021 to May 2021.
